# Supplementary material for: Cori Ester as the Ligand for Monovalent Cations
Source: MDPI journal article supplement (doi:10.3390/molecules29092133), 2024-05-04
Supplement: s1 [file s1]

## SUPPLEMENTARY MATERIALS

---

### Cori ester as the ligand for monovalent cations

Krystyna Stępnia<sup>1</sup>, Tadeusz Lis<sup>2</sup>, Elżbieta Łastawiecka<sup>1</sup> and Anna E. Koziol<sup>1,\*</sup>

<sup>1</sup> Faculty of Chemistry, Maria Curie-Skłodowska University, 20-031 Lublin, Poland; [krstepniak@poczta.onet.pl](mailto:krstepniak@poczta.onet.pl) (KS); [elzbieta.lastawiecka@mail.umcs.pl](mailto:elzbieta.lastawiecka@mail.umcs.pl) (EL)

<sup>2</sup> Faculty of Chemistry, University of Wrocław, 50-383 Wrocław, Poland; [tadeusz.lis@uwr.edu.pl](mailto:tadeusz.lis@uwr.edu.pl) (TL – emeritus)

\* Correspondence: [anna.koziol@mail.umcs.pl](mailto:anna.koziol@mail.umcs.pl) (AEK)

1. NMR spectra
2. Crystallographic data
3. Cation coordination

# NMR spectra of $\alpha$ -D-glucose 1-phosphate complexes

The NMR spectra were recorded using a Bruker Ascend (500 MHz) spectrometer in D<sub>2</sub>O as the solvent, with a sample molarity of 0.05 mmol/mL at room temperature, unless specified otherwise. Chemical shifts ( $\delta$ ) are given in ppm relative to residual H<sub>2</sub>O (<sup>1</sup>H) as a reference. Coupling constants ( $J$ ) are in Hz. The following abbreviations of signal patterns are as follows: s (singlet), d (doublet), t (triplet), q (quartet), m (multiplet), br (broad).

## NMR data of $\alpha$ -D-Glucose 1-phosphate complexes

### Dipotassium $\alpha$ -D-glucose 1-phosphate (Glc-1P2K)

<sup>1</sup>H NMR (500 MHz, D<sub>2</sub>O)  $\delta$  ppm 3.28 (dd,  $J$  = 10.09, 9.14 Hz, 1 H, H<sub>4</sub>), 3.37 (ddd,  $J$  = 9.62, 3.47, 1.73 Hz, 1 H, H<sub>2</sub>), 3.63 (dd,  $J$  = 12.30, 5.04 Hz, 1 H, H<sub>6a</sub>), 3.68 (t,  $J$  = 9.46 Hz, 1 H, H<sub>3</sub>), 3.77 (dd,  $J$  = 12.14, 2.36 Hz, 1 H, H<sub>6b</sub>), 3.82 (ddd,  $J$  = 10.17, 5.12, 2.36 Hz, 1 H, H<sub>5</sub>), 5.34 (dd,  $J$  = 7.57, 3.47 Hz, 1 H, H<sub>1</sub>);

<sup>13</sup>C NMR (126 MHz, D<sub>2</sub>O)  $\delta$  ppm 60.71 (s), 69.76 (s), 71.91 (s), 72.25 (d,  $J$  = 6.36 Hz), 73.16 (s), 93.51 (d,  $J$  = 5.45 Hz);

<sup>31</sup>P{<sup>1</sup>H} NMR (202 MHz, D<sub>2</sub>O)  $\delta$  ppm 2.39;

<sup>31</sup>P NMR (202 MHz, D<sub>2</sub>O)  $\delta$  ppm 2.37 (d,  $J$  = 7.46 Hz).

### Disodium $\alpha$ -D-glucose 1-phosphate (Glc-1P2Na)

<sup>1</sup>H NMR (500 MHz, D<sub>2</sub>O)  $\delta$  ppm 3.28 (dd,  $J$  = 10.25, 9.30 Hz, 1 H, H<sub>4</sub>), 3.36 (ddd,  $J$  = 9.77, 3.47, 1.89 Hz, 1 H, H<sub>2</sub>), 3.63 (dd,  $J$  = 12.30, 5.04 Hz, 1 H, H<sub>6a</sub>), 3.68 (t,  $J$  = 9.46 Hz, 1 H, H<sub>3</sub>), 3.77 (dd,  $J$  = 12.30, 2.52 Hz, 1 H, H<sub>6b</sub>), 3.82 (ddd,  $J$  = 10.01, 5.28, 2.36 Hz, 1 H, H<sub>5</sub>), 5.34 (dd,  $J$  = 7.57, 3.47 Hz, 1 H, H<sub>1</sub>);

<sup>13</sup>C NMR (126 MHz, D<sub>2</sub>O)  $\delta$  ppm 60.70 (s), 69.76 (s), 71.91 (s), 72.25 (d,  $J$  = 7.27 Hz), 73.16 (s), 93.51 (d,  $J$  = 5.45 Hz);

<sup>31</sup>P{<sup>1</sup>H} NMR (202 MHz, D<sub>2</sub>O)  $\delta$  ppm 2.35;

<sup>31</sup>P NMR (202 MHz, D<sub>2</sub>O)  $\delta$  ppm 2.37 (d,  $J$  = 7.46 Hz).

### Potassium sodium $\alpha$ -D-glucose 1-phosphate (Glc-1PKNa)

<sup>1</sup>H NMR (500 MHz, D<sub>2</sub>O)  $\delta$  ppm 3.29 (t,  $J$  = 9.62 Hz, 1 H, H<sub>4</sub>), 3.37 (ddd,  $J$  = 9.77, 3.47, 1.58 Hz, 1 H, H<sub>2</sub>), 3.64 (dd,  $J$  = 12.30, 5.36 Hz, 1 H, H<sub>6a</sub>), 3.68 (t,  $J$  = 9.50 Hz, 1 H, H<sub>3</sub>), 3.77 (dd,  $J$  = 12.30, 2.60 Hz, 1 H, H<sub>6b</sub>), 3.82 (ddd,  $J$  = 10.17, 5.12, 2.36 Hz, 1 H, H<sub>5</sub>), 5.35 (dd,  $J$  = 7.57, 3.47 Hz, 1 H, H<sub>1</sub>);

<sup>13</sup>C NMR (126 MHz, D<sub>2</sub>O)  $\delta$  ppm 60.69 (s), 69.74 (s), 71.91 (s), 72.23 (d,  $J$  = 6.36 Hz), 73.14 (s), 93.53 (d,  $J$  = 4.54 Hz);

<sup>31</sup>P{<sup>1</sup>H} NMR (202 MHz, D<sub>2</sub>O)  $\delta$  ppm 2.33;

<sup>31</sup>P NMR (202 MHz, D<sub>2</sub>O)  $\delta$  ppm 2.32 (d,  $J$  = 4.98 Hz).

**Table S1.** Chemical shift and coupling constant for selected atoms.

|           | C1             |          | H6a            |             | H6b            |             |
|-----------|----------------|----------|----------------|-------------|----------------|-------------|
|           | $\delta$ [ppm] | $J$ [Hz] | $\delta$ [ppm] | $J$ [Hz]    | $\delta$ [ppm] | $J$ [Hz]    |
| Glc-1P2K  | 93.51          | 5.45     | 3.63           | 12.30; 5.04 | 3.77           | 12.14; 2.36 |
| Glc-1P2Na | 93.51          | 5.45     | 3.63           | 12.30; 5.04 | 3.77           | 12.14; 2.52 |
| Glc-1PKNa | 93.51          | 4.54     | 3.64           | 12.30; 5.36 | 3.77           | 12.14; 2.60 |

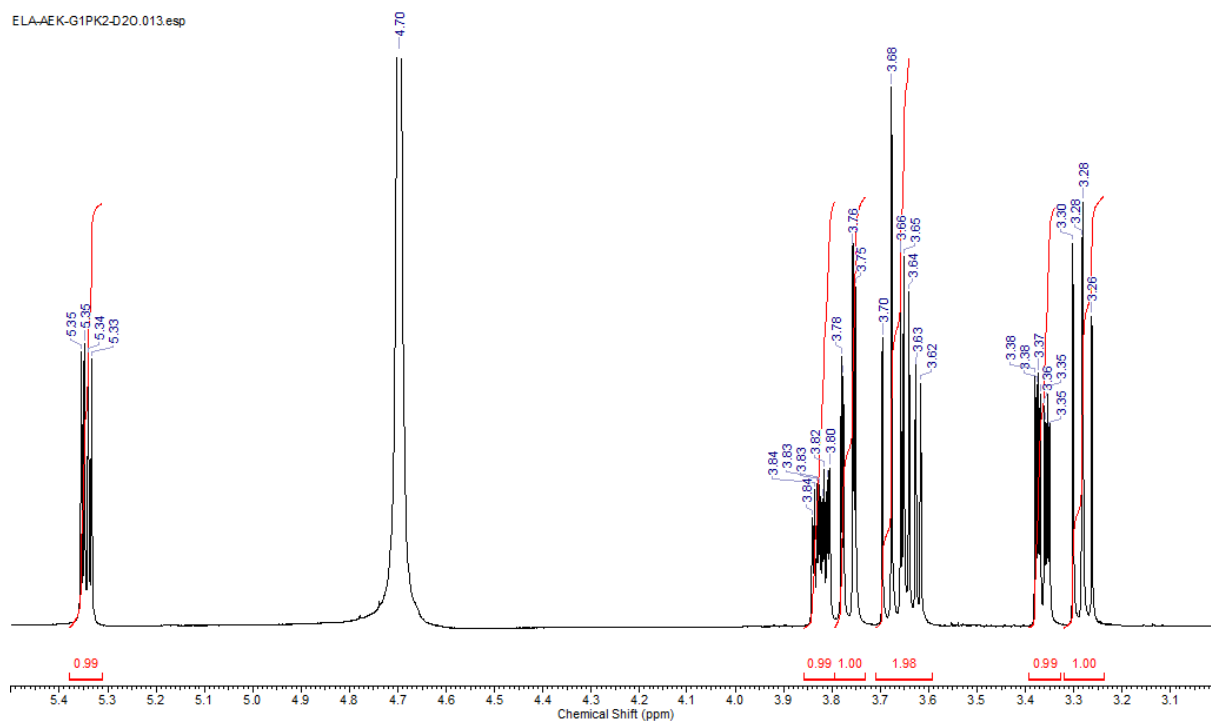

**Figure S1.**  $^1\text{H}$  NMR ( $\text{D}_2\text{O}$ , 500 MHz) spectra of dipotassium  $\alpha$ -D-glucose 1-phosphate (Glc-1P2K).

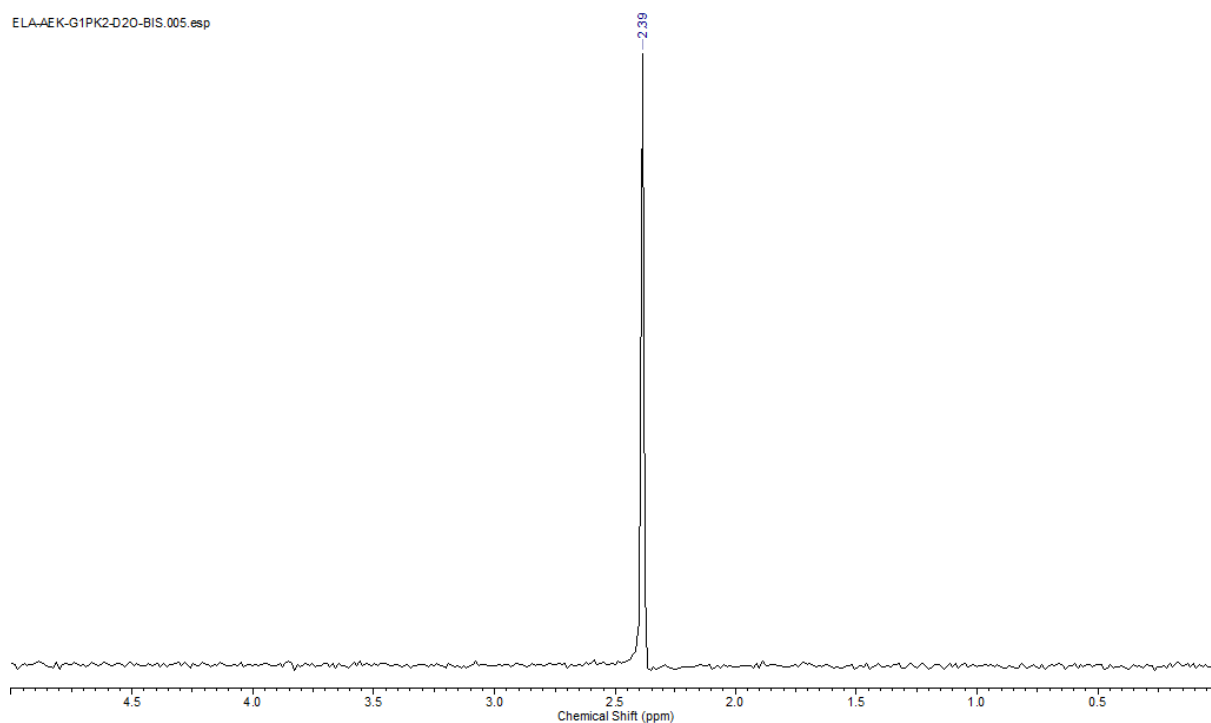

**Figure S2.**  $^{31}\text{P}$  NMR of dipotassium  $\alpha$ -D-glucose 1-phosphate (Glc-1P2K) in  $\text{D}_2\text{O}$ , with  $^1\text{H}$  decoupling, at 202 MHz.

ELA-AEK-G 1PK2-D2O-BIS.008.esp

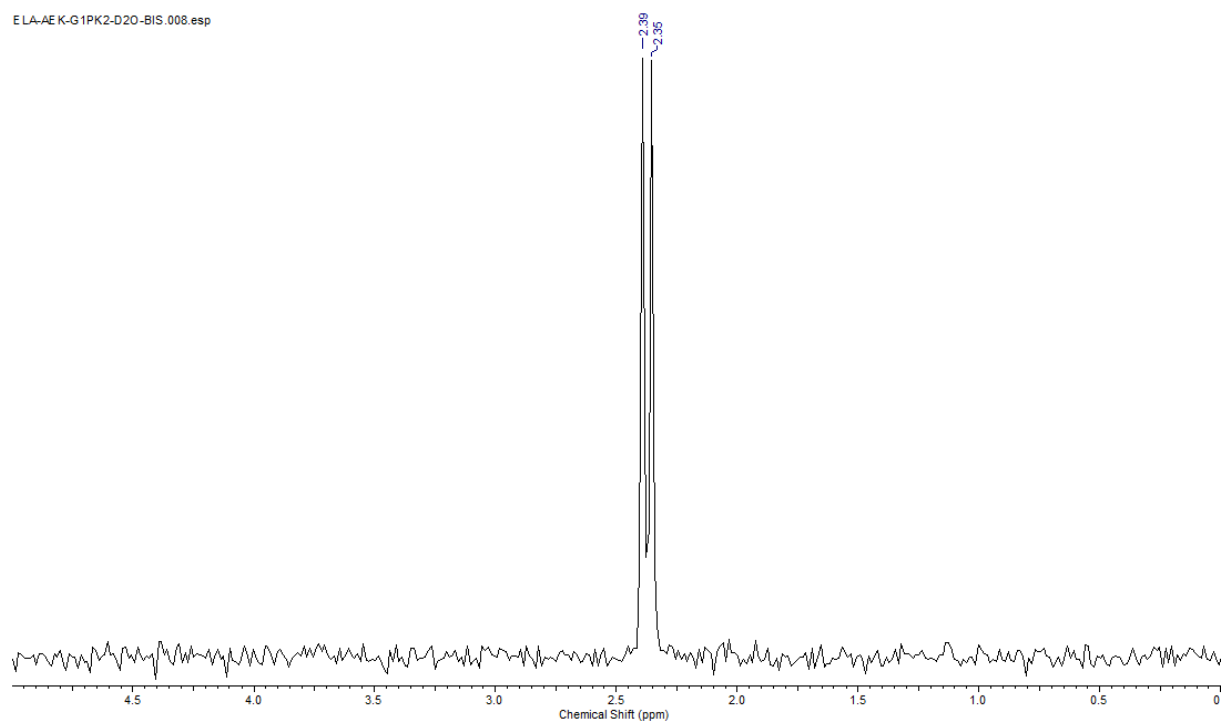

**Figure S3.**  $^{31}\text{P}$  NMR of dipotassium  $\alpha$ -D-glucose 1-phosphate (Glc-1P2K) in  $\text{D}_2\text{O}$ , with no decoupling, at 202 MHz.

ELA-AEK-G 1PN A2-D2O.005.esp

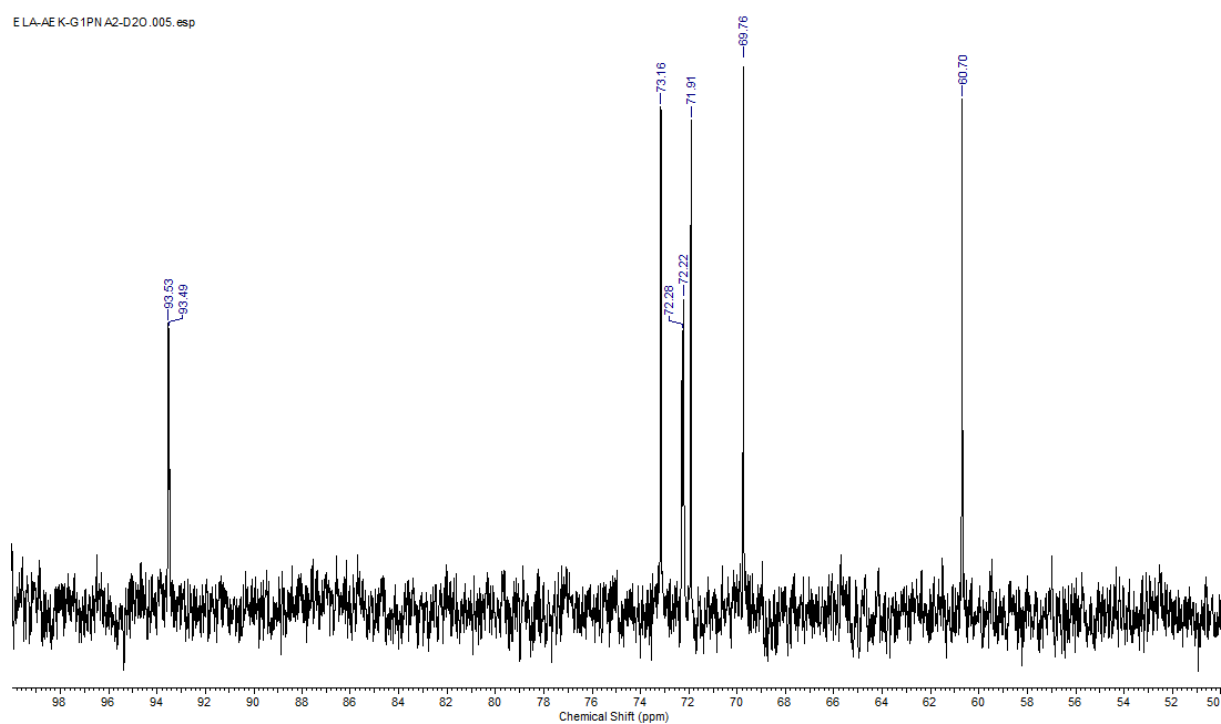

**Figure S4.**  $^{13}\text{C}$  NMR ( $\text{D}_2\text{O}$ , 126 MHz) spectra of dipotassium  $\alpha$ -D-glucose 1-phosphate (Glc-1P2K)

ELA-AE-K-G 1PN A2-D2O.006.esp

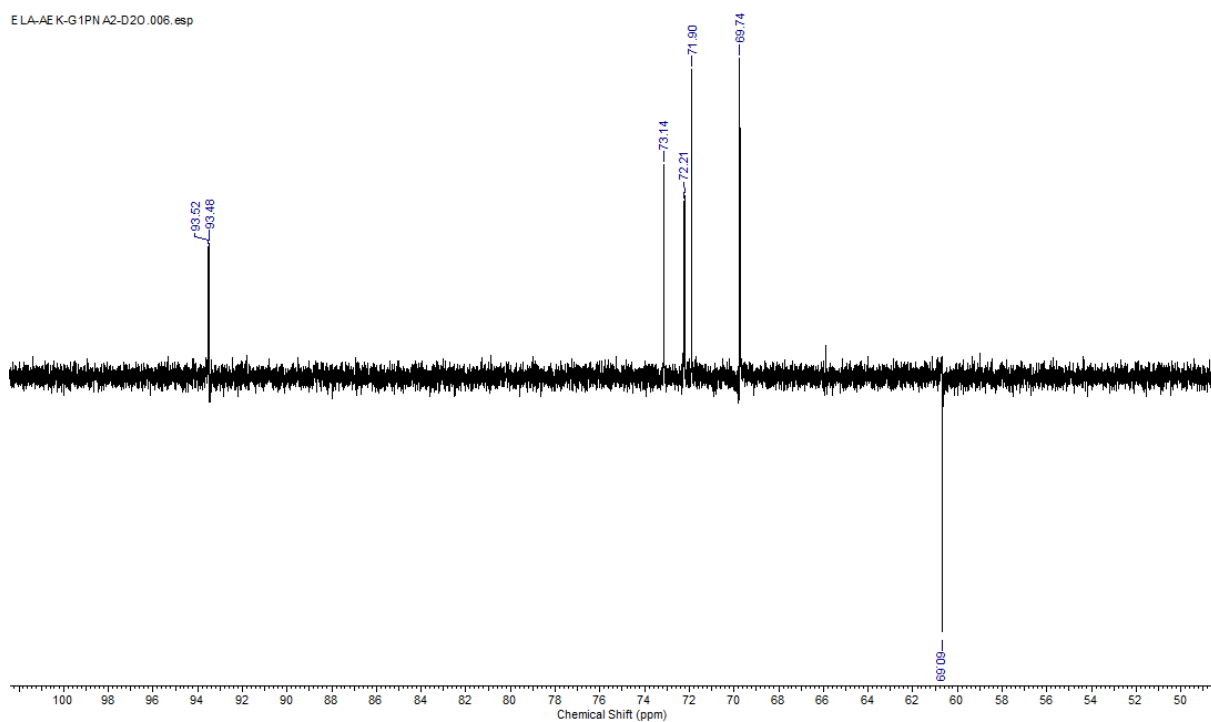

**Figure S5.** DEPT 135 spectra of dipotassium  $\alpha$ -D-glucose 1-phosphate (Glc-1PK<sub>2</sub> Glc-1P2K) (D<sub>2</sub>O, 126 MHz).

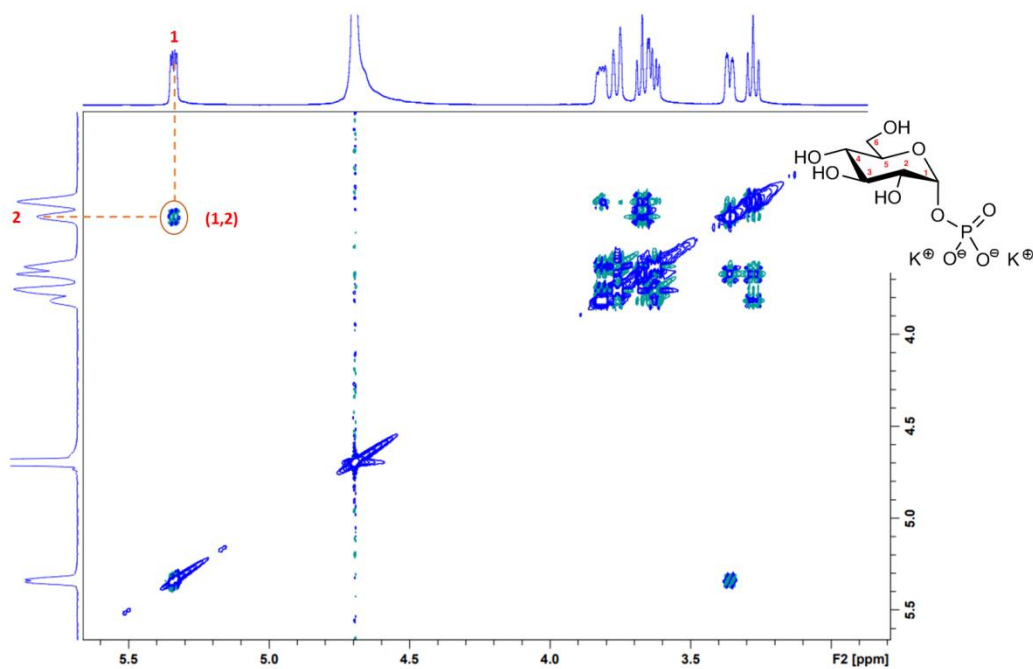

**Figure S6.** 500 MHz <sup>1</sup>H 2D NOESY spectrum of dipotassium  $\alpha$ -D-glucose 1-phosphate (Glc-1P2K).

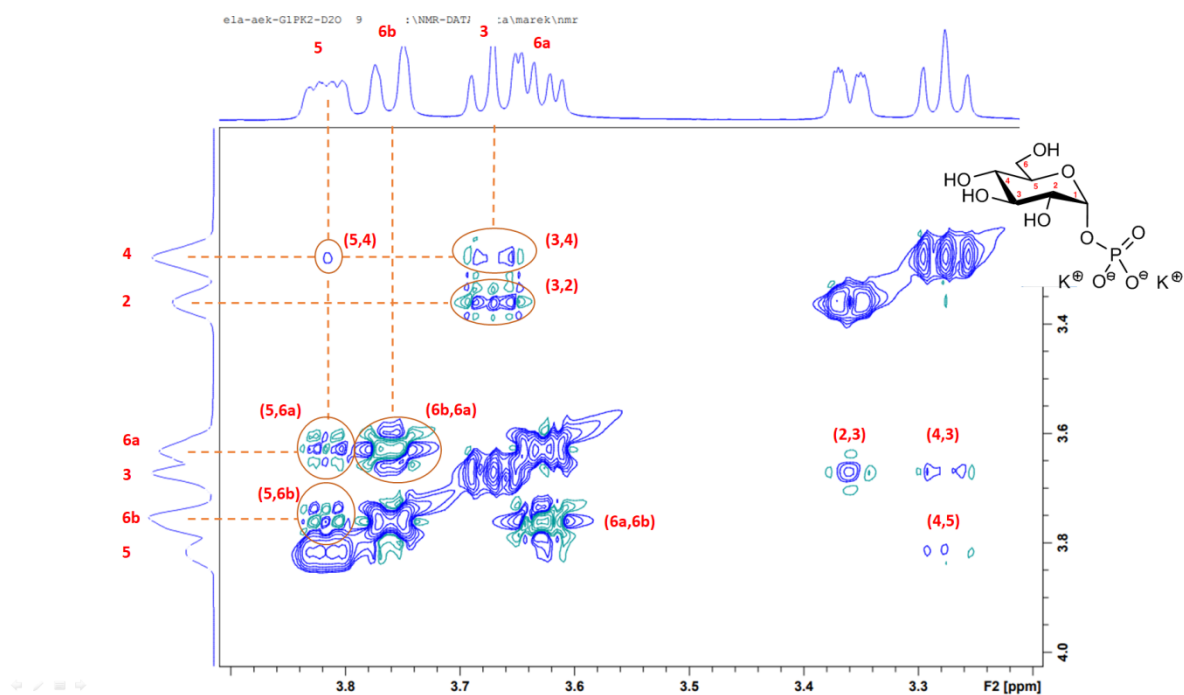

**Figure S7.** Excerpts of the 500 MHz  $^1\text{H}$  2D NOESY spectrum of dipotassium  $\alpha$ -D-glucose 1-phosphate (Glc-1P2K).

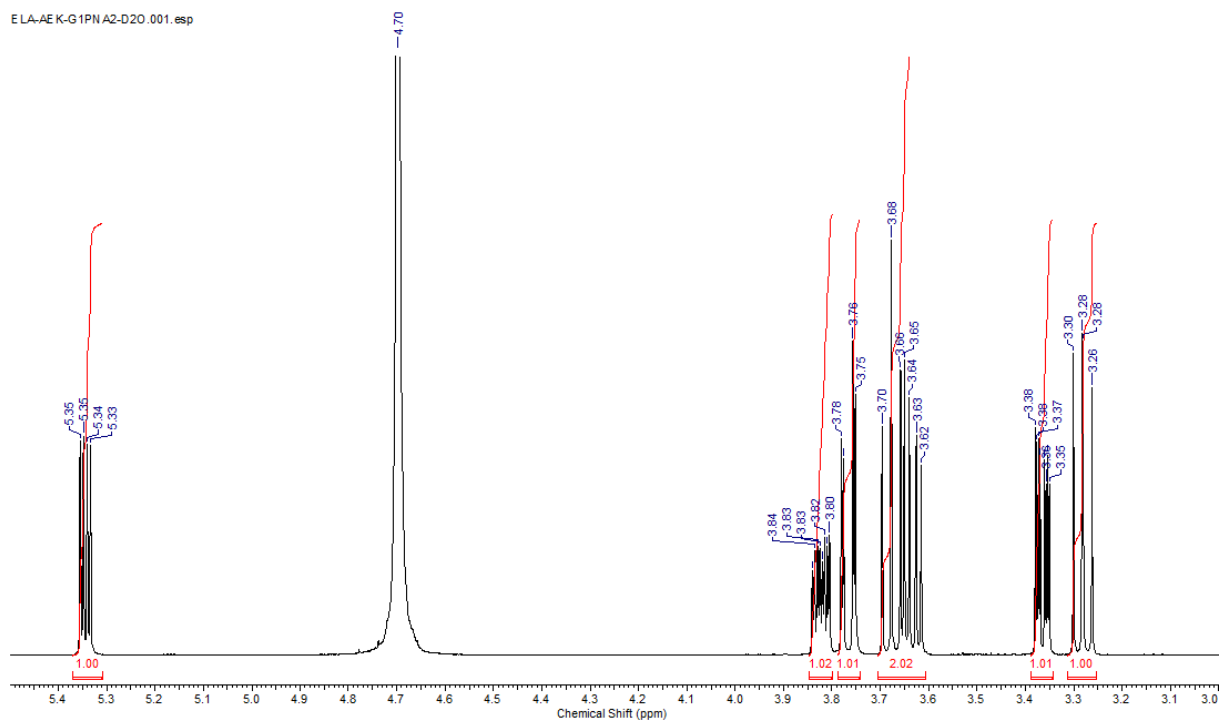

**Figure S8.**  $^1\text{H}$  NMR spectra of disodium  $\alpha$ -D-glucose 1-phosphate (Glc-1P2Na) ( $\text{D}_2\text{O}$ , 500 MHz)

NMR-AEK.010.esp

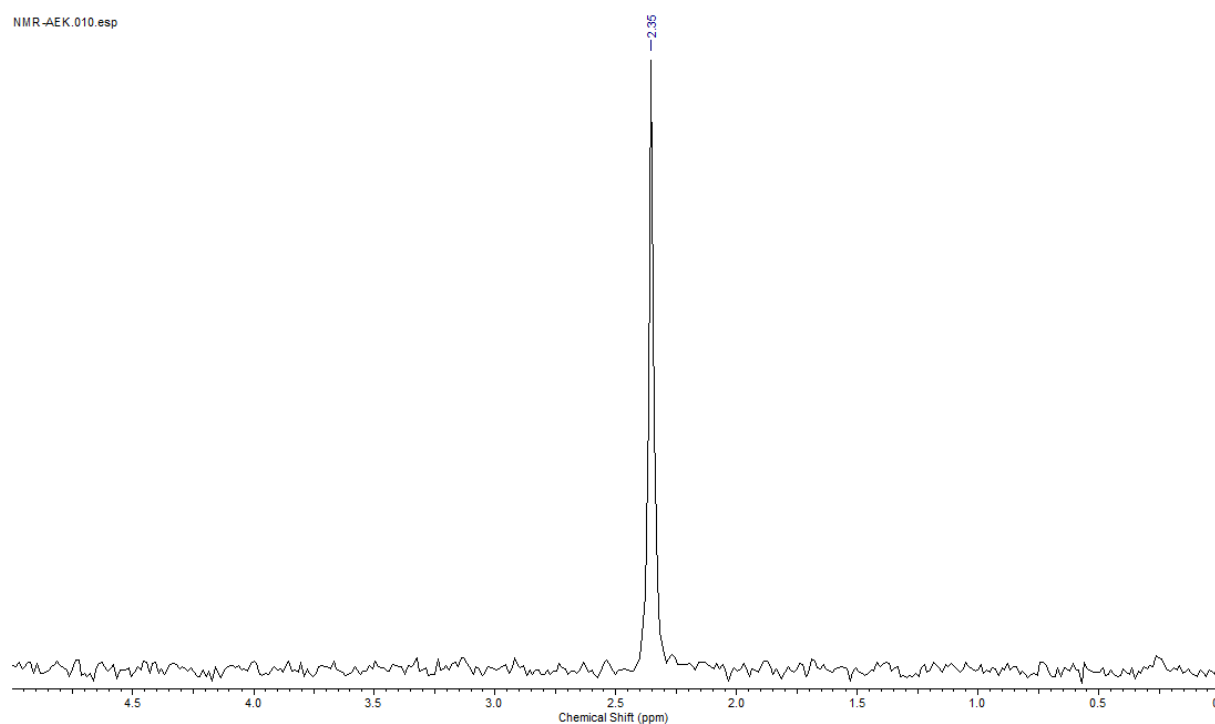

**Figure S9.**  $^{31}\text{P}$  NMR of disodium  $\alpha$ -D-glucose 1-phosphate (Glc-1P2Na) in  $\text{D}_2\text{O}$ , with  $^1\text{H}$  decoupling, at 202 MHz.

ELA-AEK-G1PN A2-D2O.012.esp

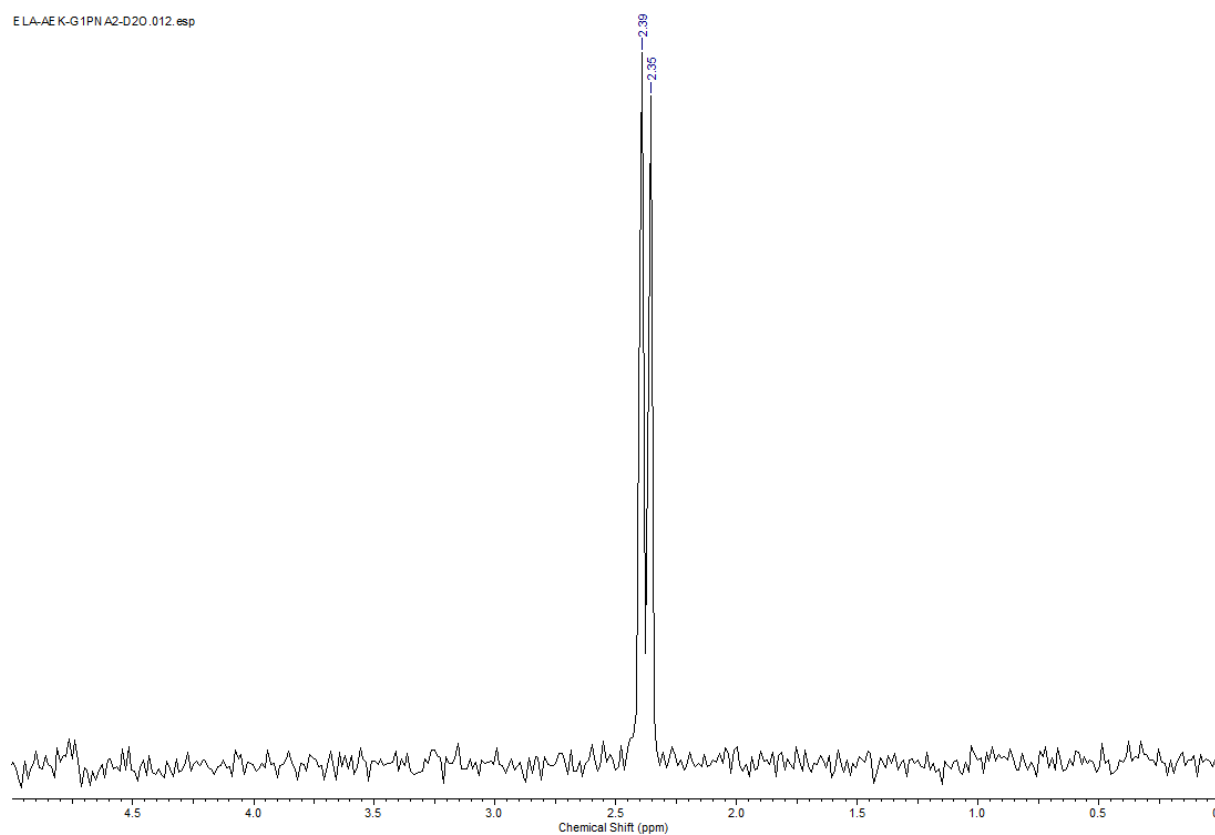

**Figure S10.**  $^{31}\text{P}$  NMR of disodium  $\alpha$ -D-glucose 1-phosphate (Glc-1P2Na) in  $\text{D}_2\text{O}$ , with no decoupling, at 202 MHz.

ELA-AE K-G 1PK2-D2O.003.esp

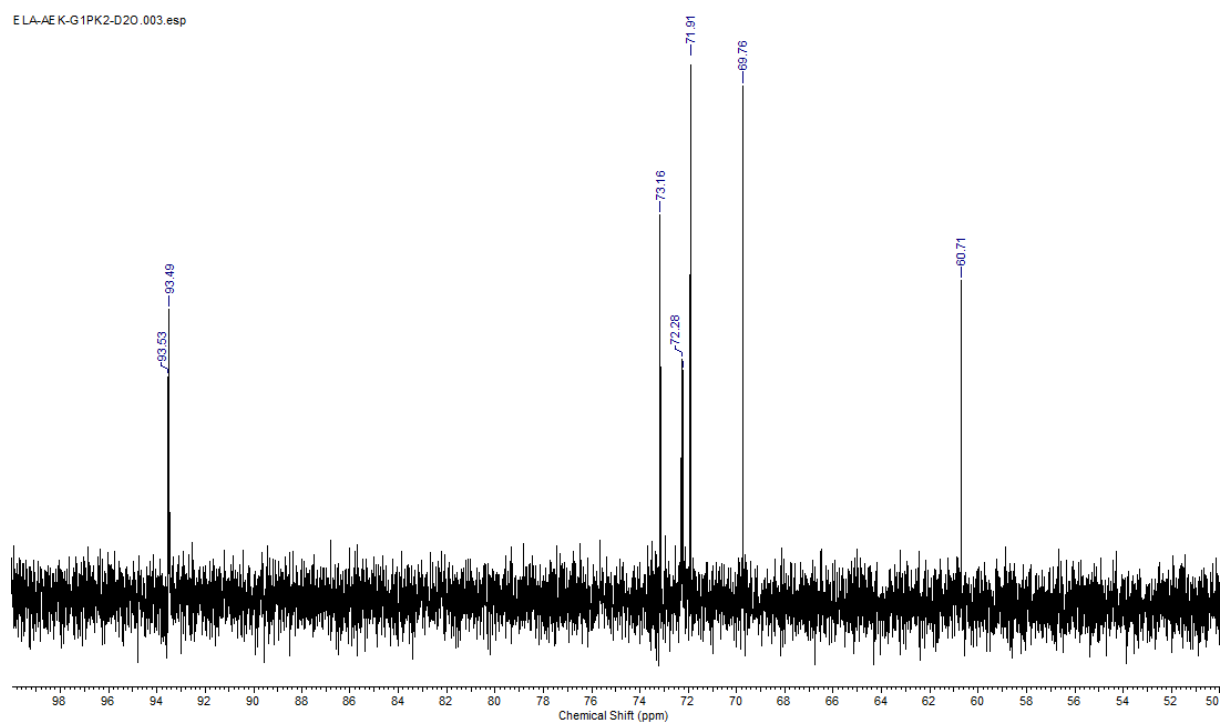

**Figure S11.** <sup>13</sup>C NMR spectra of disodium  $\alpha$ -D-glucose 1-phosphate (Glc-1P2Na) (D<sub>2</sub>O, 126 MHz)

ELA-AE K-G 1PK2-D2O.004.esp

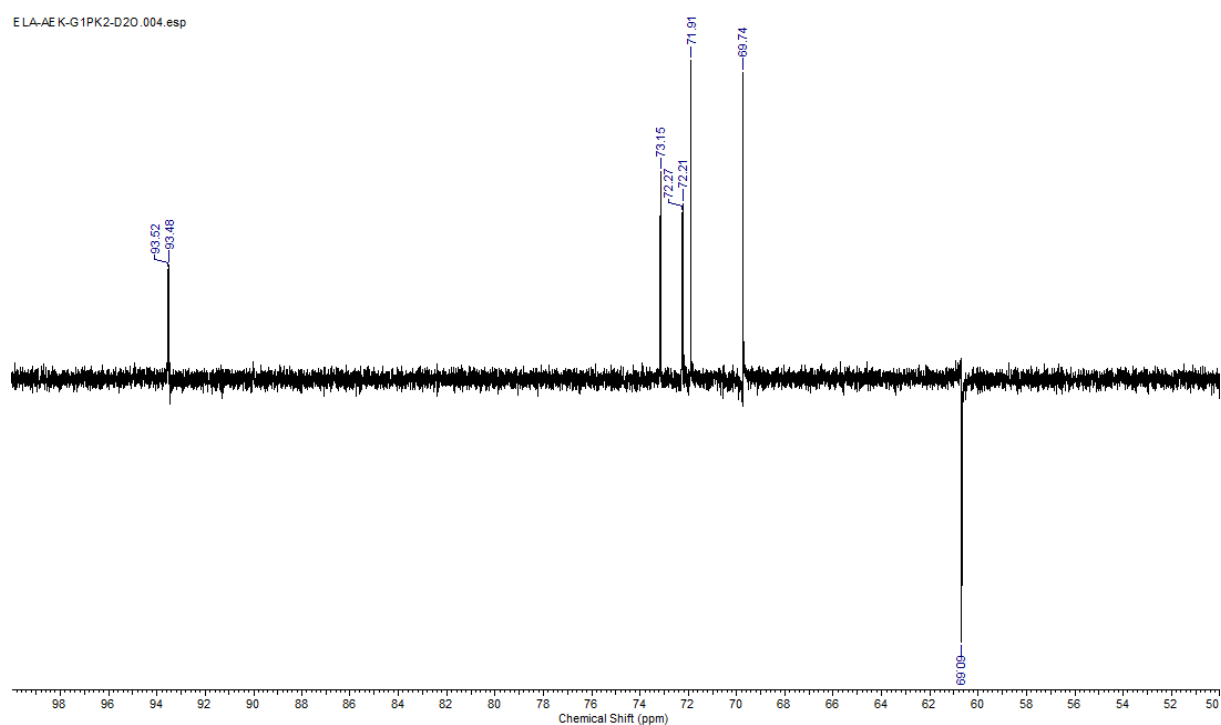

**Figure S12.** DEPT 135 spectra of disodium  $\alpha$ -D-glucose 1-phosphate (Glc-1P2Na) (D<sub>2</sub>O, 126 MHz).



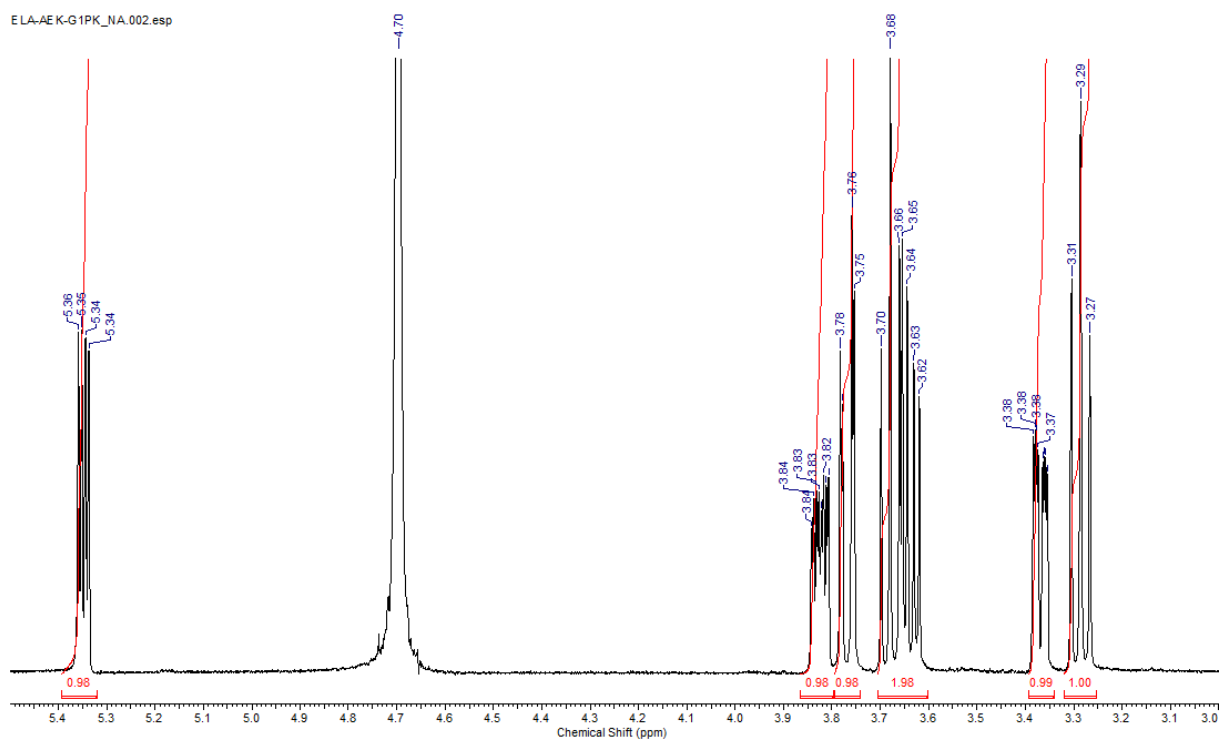

**Figure S13.**  $^1\text{H}$  NMR spectra of potassium sodium  $\alpha$ -D-glucose 1-phosphate  $\alpha$ -D-Glucose (Glc-1PKNa) ( $\text{D}_2\text{O}$ , 500 MHz)

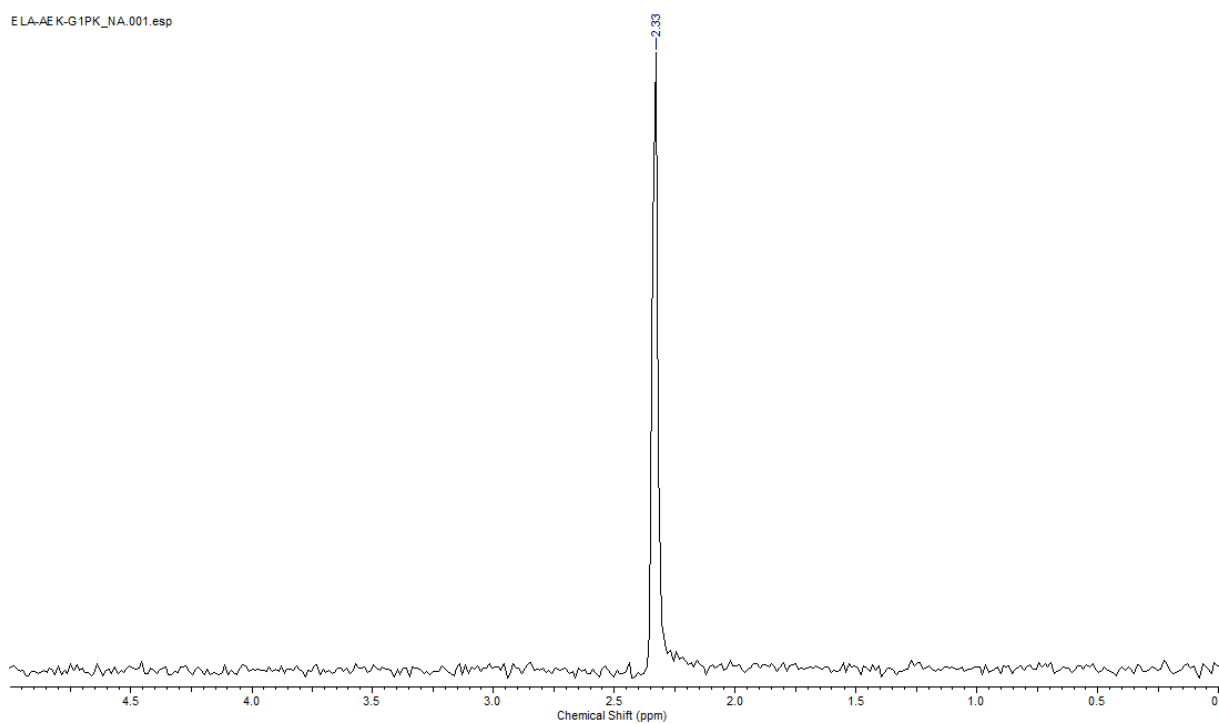

**Figure S14.**  $^{31}\text{P}$  NMR of potassium sodium  $\alpha$ -D-glucose 1-phosphate (Glc-1PKNa) in  $\text{D}_2\text{O}$ , with  $^1\text{H}$  decoupling, at 202 MHz.

ELA-AEK-G1PK\_NA.004.esp

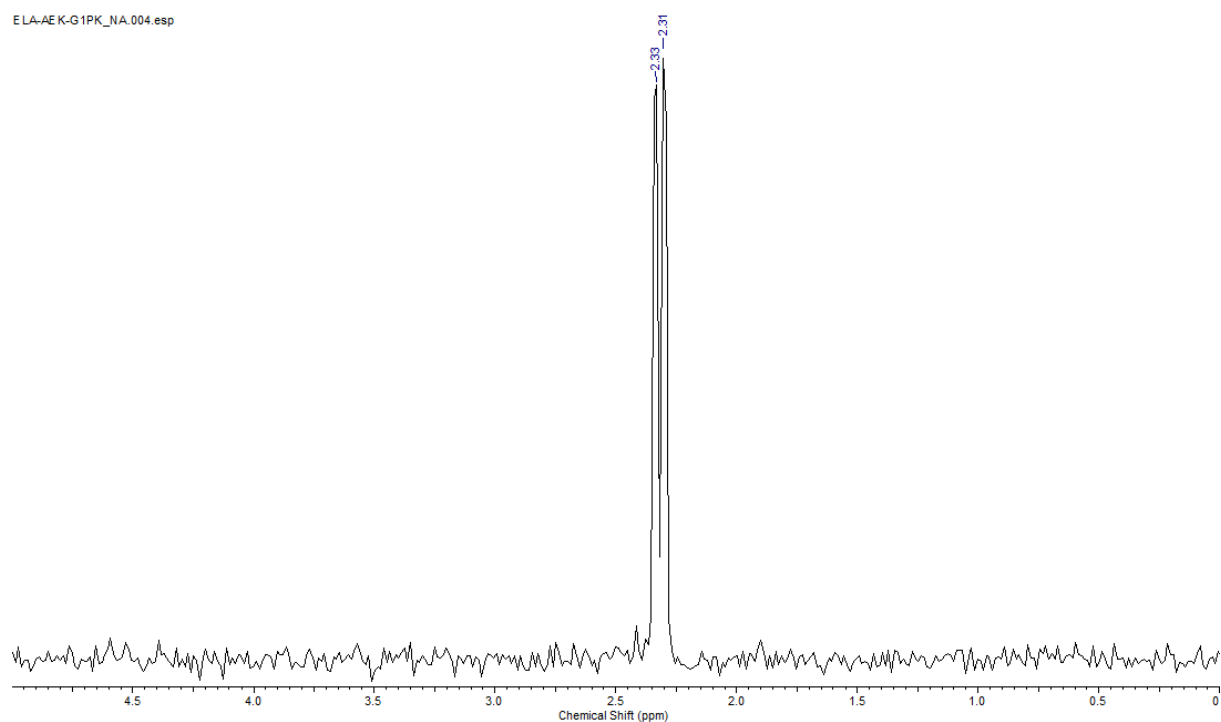

**Figure S15.**  $^{31}\text{P}$  NMR of potassium sodium  $\alpha$ -D-glucose 1-phosphate (Glc-1PKNa) in  $\text{D}_2\text{O}$ , with no decoupling, at 202 MHz.

ELA-AEK-G1PK\_NA.003.esp

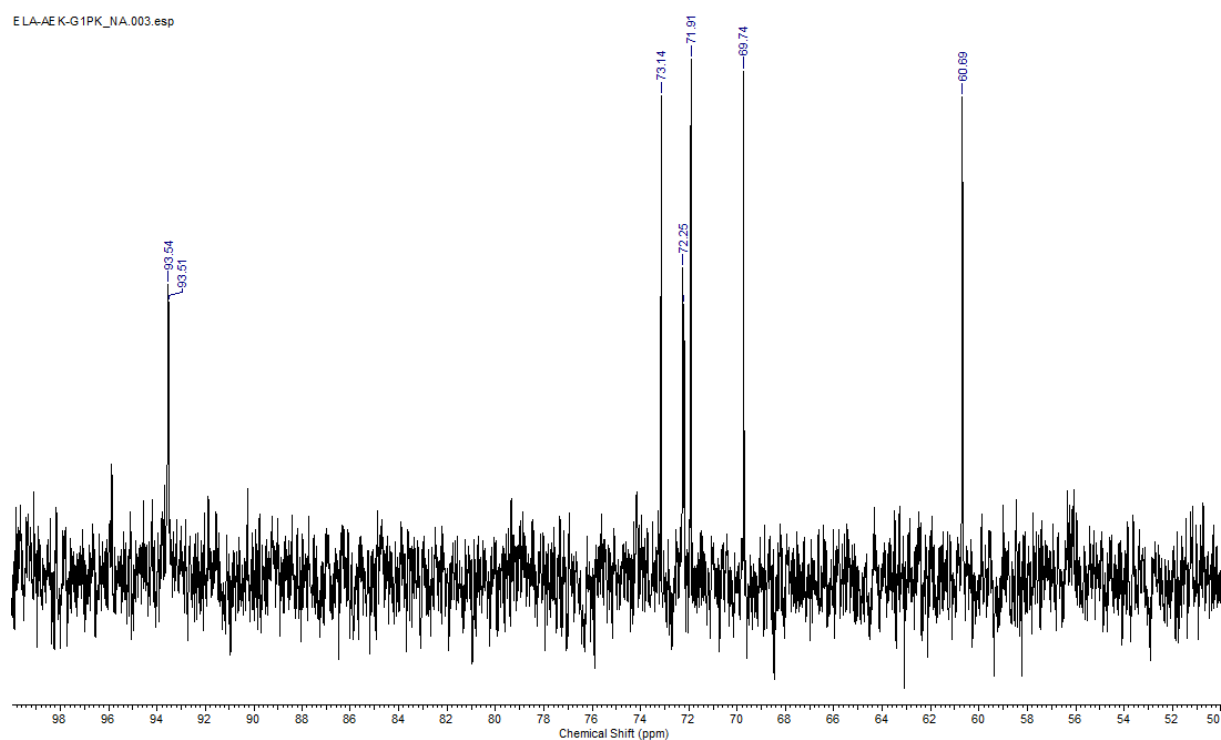

**Figure S16.**  $^{13}\text{C}$  NMR spectra of potassium sodium  $\alpha$ -D-glucose 1-phosphate (Glc-1PKNa) ( $\text{D}_2\text{O}$ , 126 MHz)

ELA-AEK-G1PK\_NA.013.esp

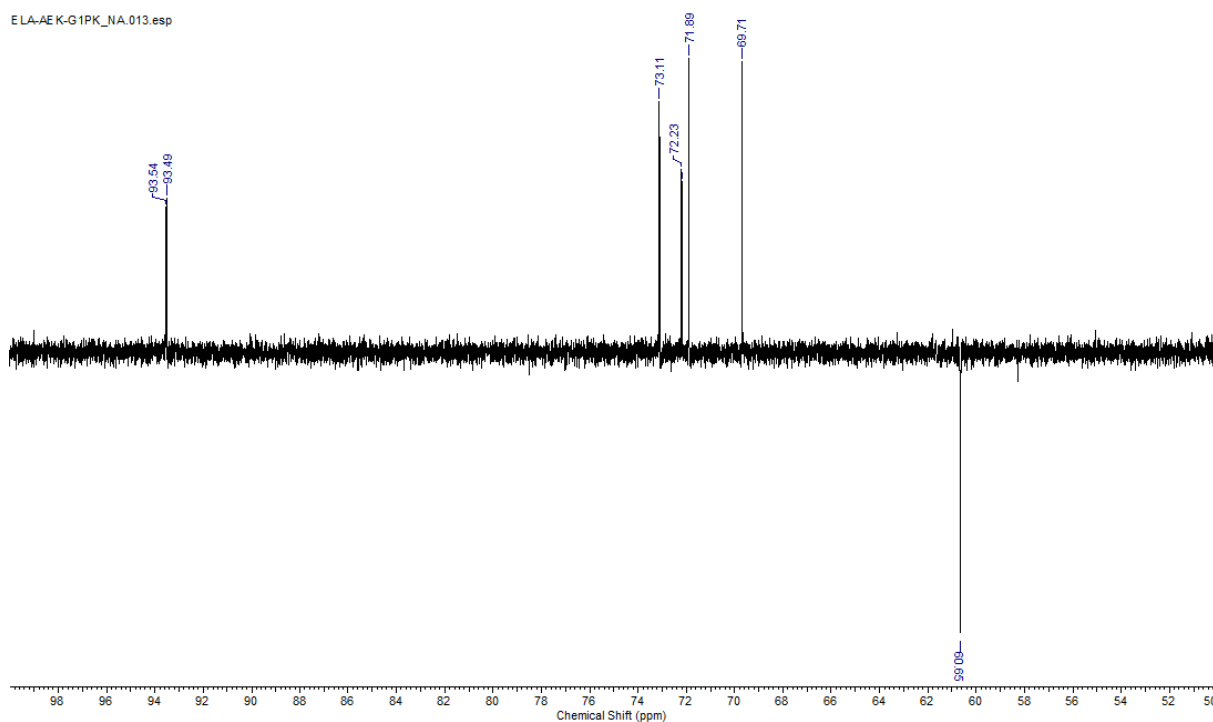

**Figure S17.** DEPT 135 spectra of potassium sodium  $\alpha$ -D-glucose 1-phosphate (Glc-1PKNa) ( $D_2O$ , 126 MHz).

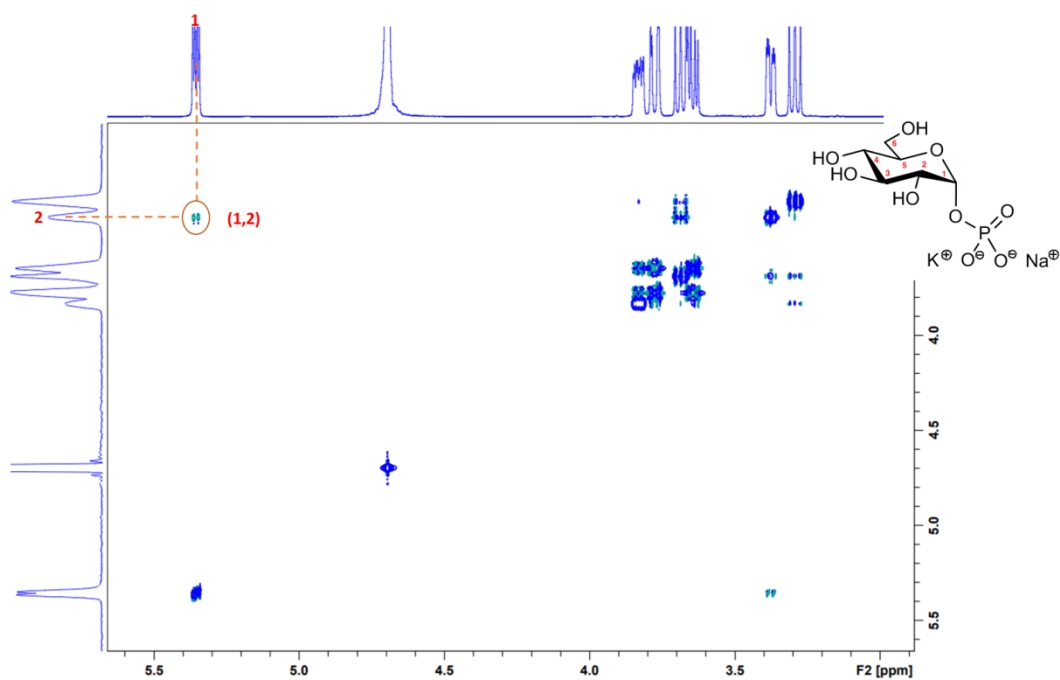

**Figure S18.** 500 MHz  $^1H$  2D NOESY spectrum of potassium sodium  $\alpha$ -D-glucose 1-phosphate (Glc-1PKNa)

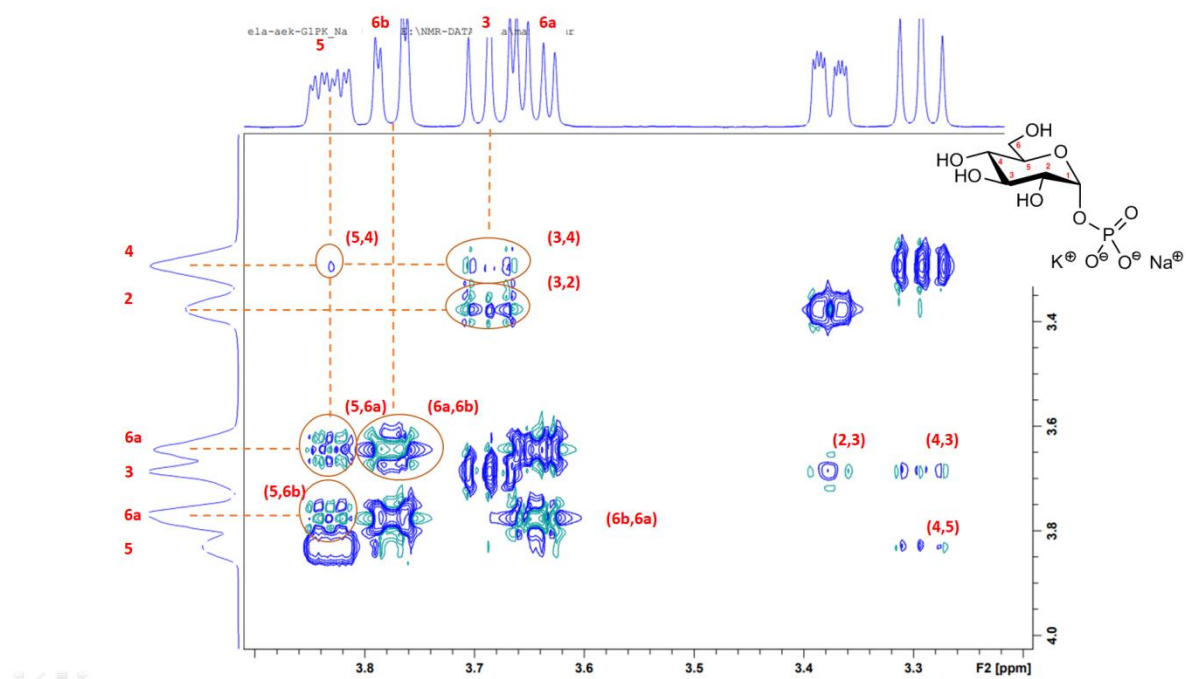

**Figure S19.** Excerpts of the 500 MHz  $^1\text{H}$  2D NOESY spectrum of potassium sodium  $\alpha$ -D-glucose 1-phosphate (Glc-1PKNa)

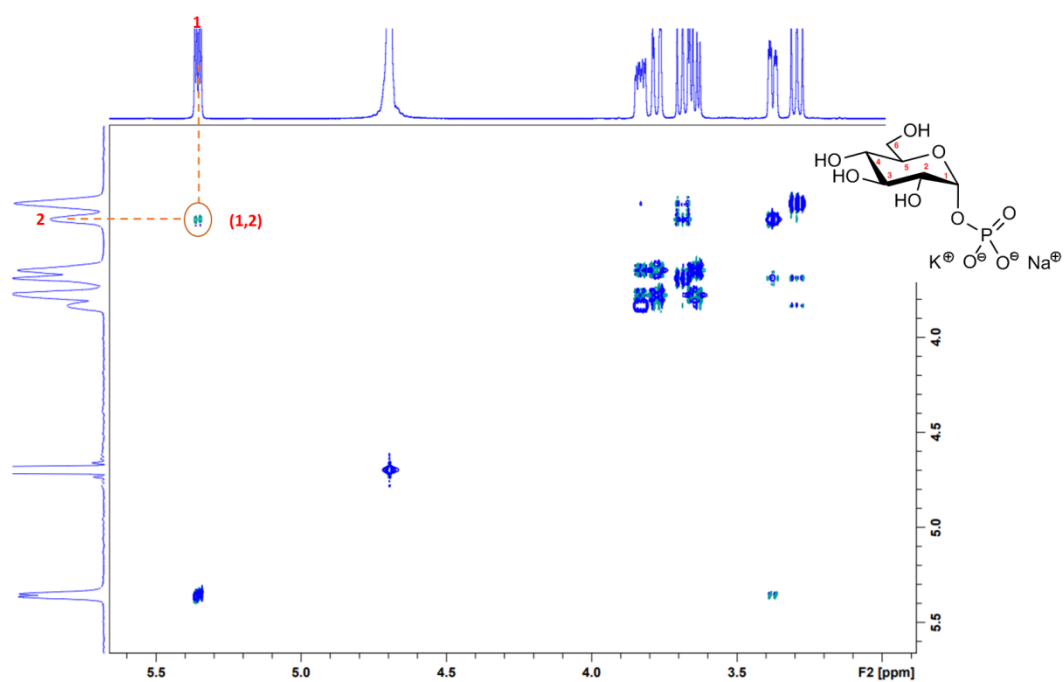

**Figure S20.** 500 MHz  $^1\text{H}$  2D NOESY spectrum of potassium sodium  $\alpha$ -D-glucose 1-phosphate (Glc-1PKNa)

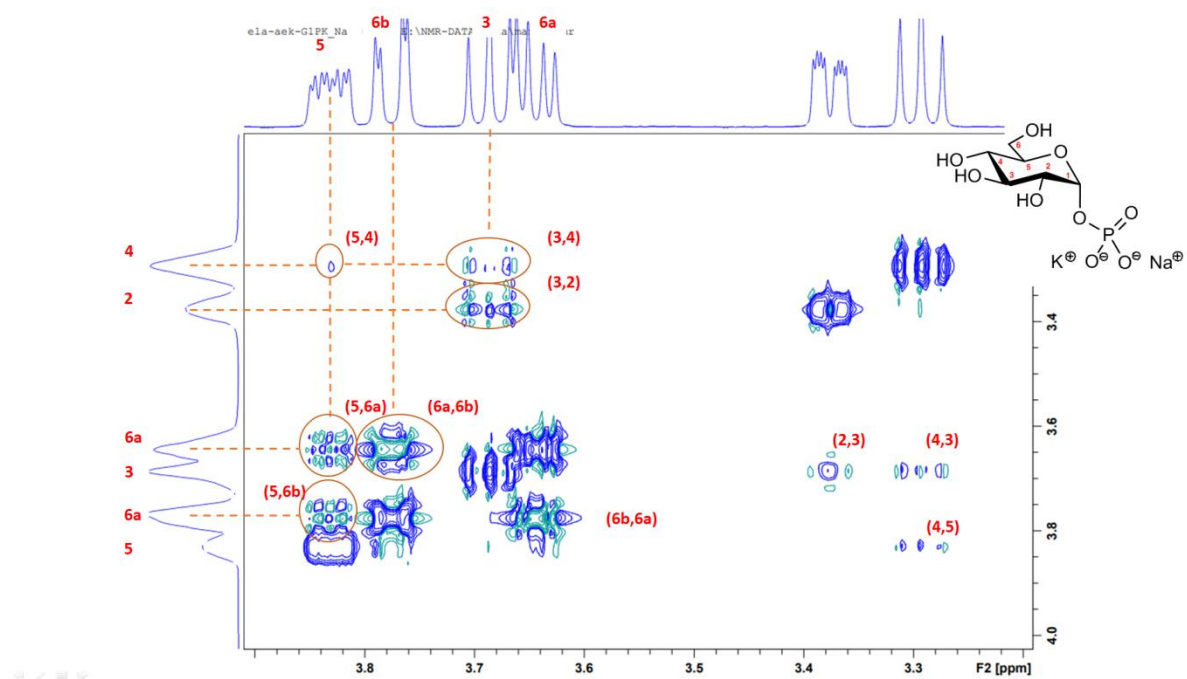

**Figure S21.** Excerpts of the 500 MHz  $^1\text{H}$  2D NOESY spectrum of potassium sodium  $\alpha$ -D-glucose 1-phosphate (Glc-1PKNa)

## CRYSTALLOGRAPHIC DATA

**Table S2.** Potassium sodium  $\alpha$ -D-glucose 1-phosphate tetrahydrate

|                                   |                                                                                       |
|-----------------------------------|---------------------------------------------------------------------------------------|
| Identification code               | G1P-KNa                                                                               |
| CCDC No                           | 2345577                                                                               |
| Formula                           | C <sub>6</sub> H <sub>19</sub> K <sub>1.50</sub> Na <sub>0.50</sub> O <sub>13</sub> P |
| Formula weight                    | 400.33                                                                                |
| Wavelength                        | 1.54184 Å                                                                             |
| Crystal system                    | Orthorhombic                                                                          |
| Space group                       | <i>P</i> 2 <sub>1</sub> 2 <sub>1</sub> 2                                              |
| Unit cell dimensions              | a = 16.8360(4) Å                                                                      |
|                                   | b = 13.4089(3) Å                                                                      |
|                                   | c = 6.6729(1) Å                                                                       |
| Volume                            | 1506.42(5) Å <sup>3</sup>                                                             |
| Z                                 | 4                                                                                     |
| Density (calculated)              | 1.765 g/cm <sup>3</sup>                                                               |
| Absorption coefficient            | 6.121 mm <sup>-1</sup>                                                                |
| F(000)                            | 832                                                                                   |
| Theta range for data collection   | 4.215 to 76.361°.                                                                     |
| Index ranges                      | -21 ≤ h ≤ 19, -16 ≤ k ≤ 16, -8 ≤ l ≤ 6                                                |
| Reflections collected             | 10925                                                                                 |
| Independent reflections           | 3123 [R(int) = 0.0314]                                                                |
| Completeness to theta = 67.684°   | 99.9 %                                                                                |
| Data / restraints / parameters    | 3123 / 0 / 213                                                                        |
| Goodness-of-fit on F <sup>2</sup> | 1.062                                                                                 |
| Final R indices [I > 2σ(I)]       | R1 = 0.0321, wR2 = 0.0852                                                             |
| R indices (all data)              | R1 = 0.0343, wR2 = 0.0873                                                             |
| Absolute structure parameter      | -0.004(6)                                                                             |
| Largest diff. peak and hole       | 0.46 and -0.45 e.Å <sup>-3</sup>                                                      |

**Table S3.** Disodium  $\alpha$ -D-glucose 1-phosphate pentahydrate

|                                   |                                                                  |
|-----------------------------------|------------------------------------------------------------------|
| <b>Identification code</b>        | <b>Glc-1P2Na-5H<sub>2</sub>O</b>                                 |
| <b>CCDC No</b>                    | <b>2345578</b>                                                   |
| Empirical formula                 | C <sub>6</sub> H <sub>21</sub> Na <sub>2</sub> O <sub>14</sub> P |
| Formula weight                    | 394.18                                                           |
| Wavelength                        | 1.54184 Å                                                        |
| Crystal system                    | Orthorhombic                                                     |
| Space group                       | <i>P</i> 2 <sub>1</sub> 2 <sub>1</sub> 2 <sub>1</sub>            |
| Unit cell dimensions              | a = 6.6347(5) Å                                                  |
|                                   | b = 8.7585(9) Å                                                  |
| $\beta$ = 99.147(2)°.             | c = 27.129(2) Å                                                  |
| Volume                            | 1576.5(2) Å <sup>3</sup>                                         |
| Z                                 | 4                                                                |
| Density (calculated)              | 1.661 g/cm <sup>3</sup>                                          |
| Absorption coefficient            | 2.783 mm <sup>-1</sup>                                           |
| F(000)                            | 824                                                              |
| Theta range for data collection   | 5.307 to 76.416°                                                 |
| Index ranges                      | -8 < = h < = 8, -10 < = k < = 10, -33 < = l < = 24               |
| Reflections collected             | 10188                                                            |
| Independent reflections           | 3208 [R(int) = 0.0381]                                           |
| Completeness to theta = 67.684°   | 99.7 %                                                           |
| Data / restraints / parameters    | 3208 / 0 / 253                                                   |
| Goodness-of-fit on F <sup>2</sup> | 1.161                                                            |
| Final R indices [I > 2sigma(I)]   | R1 = 0.0277, wR2 = 0.0613                                        |
| R indices (all data)              | R1 = 0.0367, wR2 = 0.0814                                        |
| Absolute structure parameter      | 0.035(16)                                                        |
| Extinction coefficient            | 0.0016(3)                                                        |
| Largest diff. peak and hole       | 0.27 and -0.26 e.Å <sup>-3</sup>                                 |

**Table S4.** Disodium  $\alpha$ -D-glucose 1-phosphate trihemihydrate (redetermination – CIMDUX01)

|                                   |                                                                     |
|-----------------------------------|---------------------------------------------------------------------|
| Identification code               | <b>G1P2NA-3.5H<sub>2</sub>O</b>                                     |
| CCDC No                           | <b>23455775</b>                                                     |
| Empirical formula                 | C <sub>6</sub> H <sub>18</sub> Na <sub>2</sub> O <sub>12.50</sub> P |
| Formula weight                    | 367.15                                                              |
| Wavelength                        | 1.54184 Å                                                           |
| Crystal system                    | Monoclinic                                                          |
| Space group                       | C 2                                                                 |
| Unit cell dimensions              | a = 8.4325(2) Å                                                     |
|                                   | b = 10.1983(2) Å                                                    |
|                                   | c = 16.5857(4) Å                                                    |
|                                   | $\beta$ = 99.147(2)°                                                |
| Volume                            | 1408.19(6) Å <sup>3</sup>                                           |
| Z                                 | 4                                                                   |
| Density (calculated)              | 1.732 g/cm <sup>3</sup>                                             |
| Absorption coefficient            | 2.986 mm <sup>-1</sup>                                              |
| F(000)                            | 764                                                                 |
| Theta range for data collection   | 5.403 to 76.054°.                                                   |
| Index ranges                      | -10 ≤ h ≤ 10, -12 ≤ k ≤ 12, -19 ≤ l ≤ 20                            |
| Reflections collected             | 2612                                                                |
| Independent reflections           | 2017 [R(int) = 0.0242]                                              |
| Completeness to theta = 67.684°   | 99.6 %                                                              |
| Data / restraints / parameters    | 2017 / 1 / 265                                                      |
| Goodness-of-fit on F <sup>2</sup> | 1.043                                                               |
| Final R indices [I > 2σ(I)]       | R1 = 0.0243, wR2 = 0.0635                                           |
| R indices (all data)              | R1 = 0.0245, wR2 = 0.0639                                           |
| Absolute structure parameter      | -0.06(2)                                                            |
| Extinction coefficient            | 0.0081(4)                                                           |
| Largest diff. peak and hole       | 0.27 and -0.23 e.Å <sup>-3</sup>                                    |



**Table S5.** Dipotassium  $\alpha$ -D-glucose 1-phosphate dihydrate (redetermination – KGLUCP02)

|                                                     |                                                                 |
|-----------------------------------------------------|-----------------------------------------------------------------|
| <b>Identification code</b>                          | <b>G1P2K2H2O</b>                                                |
| <b>CCDC No</b>                                      | <b>2345574</b>                                                  |
| Empirical formula                                   | C <sub>6</sub> H <sub>15</sub> K <sub>2</sub> O <sub>11</sub> P |
| Formula weight                                      | 372.35                                                          |
| Wavelength                                          | 1.54184 Å                                                       |
| Crystal system                                      | Monoclinic                                                      |
| Space group                                         | <i>P</i> 2 <sub>1</sub>                                         |
| Unit cell dimensions                                | <i>a</i> = 7.5234(3) Å                                          |
| $\beta$ = 110.576(5)°                               | <i>b</i> = 9.0643(3) Å                                          |
|                                                     | <i>c</i> = 10.4588(4) Å                                         |
| Volume                                              | 667.73(5) Å <sup>3</sup>                                        |
| <i>Z</i>                                            | 2                                                               |
| Density (calculated)                                | 1.852 g/cm <sup>3</sup>                                         |
| Absorption coefficient                              | 7.959 mm <sup>-1</sup>                                          |
| <i>F</i> (000)                                      | 384                                                             |
| Theta range for data collection                     | 4.516 to 76.141°.                                               |
| Index ranges                                        | -9 ≤ <i>h</i> ≤ 8, -8 ≤ <i>k</i> ≤ 11, -11 ≤ <i>l</i> ≤ 13      |
| Reflections collected                               | 4319                                                            |
| Independent reflections                             | 2178 [ <i>R</i> (int) = 0.0272]                                 |
| Completeness to theta = 67.684°                     | 99.8 %                                                          |
| Data / restraints / parameters                      | 2178 / 1 / 217                                                  |
| Goodness-of-fit on <i>F</i> <sup>2</sup>            | 1.075                                                           |
| Final <i>R</i> indices [ <i>I</i> > 2σ( <i>I</i> )] | <i>R</i> 1 = 0.0294, <i>wR</i> 2 = 0.0774                       |
| <i>R</i> indices (all data)                         | <i>R</i> 1 = 0.0298, <i>wR</i> 2 = 0.0779                       |
| Absolute structure parameter                        | 0.063(10)                                                       |
| Largest diff. peak and hole                         | 0.25 and -0.50 e.Å <sup>-3</sup>                                |

**Table S6.** Diammonium  $\alpha$ -D-glucose 1-phosphate trihydrate

|                                   |                                                                 |
|-----------------------------------|-----------------------------------------------------------------|
| <b>Identification code</b>        | <b>G1P2NH4</b>                                                  |
| <b>CCDC No</b>                    | <b>2345576</b>                                                  |
| Empirical formula                 | C <sub>6</sub> H <sub>25</sub> N <sub>2</sub> O <sub>12</sub> P |
| Formula weight                    | 348.25                                                          |
| Wavelength                        | 0.71069 Å                                                       |
| Crystal system                    | Orthorhombic                                                    |
| Space group                       | <i>P</i> 2 <sub>1</sub> 2 <sub>1</sub> 2                        |
| Unit cell dimensions              | a = 13.756(7) Å                                                 |
|                                   | b = 16.929(7) Å                                                 |
|                                   | c = 6.502(3) Å                                                  |
| Volume                            | 1514.2(12) Å <sup>3</sup>                                       |
| <i>Z</i>                          | 4                                                               |
| Density (calculated)              | 1.528 g/cm <sup>3</sup>                                         |
| Absorption coefficient            | 0.244 mm <sup>-1</sup>                                          |
| F(000)                            | 744                                                             |
| Theta range for data collection   | 2.825 to 32.568°                                                |
| Index ranges                      | -20 ≤ h ≤ 20, -22 ≤ k ≤ 25, -9 ≤ l ≤ 9                          |
| Reflections collected             | 3297                                                            |
| Independent reflections           | 3297 [R(int) = 0.028]                                           |
| Completeness to theta = 25.240°   | 84.8 %                                                          |
| Data / restraints / parameters    | 3297 / 0 / 204                                                  |
| Goodness-of-fit on F <sup>2</sup> | 1.083                                                           |
| Final R indices [I > 2σ(I)]       | R1 = 0.0440, wR2 = 0.1193                                       |
| R indices (all data)              | R1 = 0.0440, wR2 = 0.1193                                       |
| Absolute structure parameter      | -0.02(8)                                                        |
| Largest diff. peak and hole       | 0.57 and -0.35 e. Å <sup>-3</sup>                               |

**Table S7.** Ammonium sodium  $\alpha$ -D-glucose 1-phosphate tetrahydrate

|                                   |                                                                                       |
|-----------------------------------|---------------------------------------------------------------------------------------|
| <b>Identification code</b>        | <b>Glc-1P(NH<sub>4</sub>)Na</b>                                                       |
| <b>CCDC No</b>                    | <b>2345579</b>                                                                        |
| Empirical formula                 | C <sub>6</sub> H <sub>25</sub> N <sub>1.50</sub> Na <sub>0.50</sub> O <sub>13</sub> P |
| Formula weight                    | 368.74                                                                                |
| Wavelength                        | 1.54184 Å                                                                             |
| Crystal system                    | Orthorhombic                                                                          |
| Space group                       | <i>P</i> 2 <sub>1</sub> 2 <sub>1</sub> 2                                              |
| Unit cell dimensions              | a = 16.9272(3) Å                                                                      |
|                                   | b = 13.3171(3) Å                                                                      |
|                                   | c = 6.6436(1) Å                                                                       |
| Volume                            | 1497.61(5) Å <sup>3</sup>                                                             |
| <i>Z</i>                          | 4                                                                                     |
| Density (calculated)              | 1.635 g/cm <sup>3</sup>                                                               |
| Absorption coefficient            | 2.462 mm <sup>-1</sup>                                                                |
| F(000)                            | 784                                                                                   |
| Theta range for data collection   | 5.226 to 76.184°                                                                      |
| Index ranges                      | -21 ≤ <i>h</i> ≤ 18, -16 ≤ <i>k</i> ≤ 16, -8 ≤ <i>l</i> ≤ 7                           |
| Reflections collected             | 10118                                                                                 |
| Independent reflections           | 3069 [R(int) = 0.0359]                                                                |
| Completeness to theta = 67.684°   | 99.7 %                                                                                |
| Data / restraints / parameters    | 3069 / 0 / 200                                                                        |
| Goodness-of-fit on F <sup>2</sup> | 1.066                                                                                 |
| Final R indices [I > 2σ(I)]       | R <sub>1</sub> = 0.0579, wR <sub>2</sub> = 0.1565                                     |
| R indices (all data)              | R <sub>1</sub> = 0.0647, wR <sub>2</sub> = 0.1609                                     |
| Absolute structure parameter      | 0.008(14)                                                                             |
| Largest diff. peak and hole       | 0.64 and -0.62 e.Å <sup>-3</sup>                                                      |

**Table S8.** Ammonium potassium  $\alpha$ -D-glucose 1-hydrogenphosphate

|                                   |                                                                                        |
|-----------------------------------|----------------------------------------------------------------------------------------|
| <b>Identification code</b>        | <b>Glc-1PH(NH<sub>4</sub>)K</b>                                                        |
| <b>CCDC No</b>                    | <b>2345573</b>                                                                         |
| Empirical formula                 | C <sub>6</sub> H <sub>14.75</sub> K <sub>0.31</sub> N <sub>0.69</sub> O <sub>9</sub> P |
| Formula weight                    | 283.74                                                                                 |
| Wavelength                        | 1.5418 Å                                                                               |
| Crystal system                    | Orthorhombic                                                                           |
| Space group                       | <i>P</i> 2 <sub>1</sub> 2 <sub>1</sub> 2 <sub>1</sub>                                  |
| Unit cell dimensions              | a = 7.147(4) Å                                                                         |
|                                   | b = 12.036(5) Å                                                                        |
|                                   | c = 12.524(5) Å                                                                        |
| Volume                            | 1077.3(9) Å <sup>3</sup>                                                               |
| <i>Z</i>                          | 4                                                                                      |
| Density (calculated)              | 1.749 g/cm <sup>3</sup>                                                                |
| Absorption coefficient            | 3.793 mm <sup>-1</sup>                                                                 |
| F(000)                            | 594                                                                                    |
| Theta range for data collection   | 5.096 to 74.984°.                                                                      |
| Index ranges                      | -8 ≤ h ≤ 0, -15 ≤ k ≤ 14, -15 ≤ l ≤ 15                                                 |
| Reflections collected             | 4183                                                                                   |
| Independent reflections           | 2211 [R(int) = 0.0427]                                                                 |
| Completeness to theta = 67.680°   | 99.9 %                                                                                 |
| Data / restraints / parameters    | 2211 / 0 / 164                                                                         |
| Goodness-of-fit on F <sup>2</sup> | 1.048                                                                                  |
| Final R indices [I > 2σ(I)]       | R1 = 0.0338, wR2 = 0.0851                                                              |
| R indices (all data)              | R1 = 0.0382, wR2 = 0.0873                                                              |
| Absolute structure parameter      | 0.033(12)                                                                              |
| Largest diff. peak and hole       | 0.56 and -0.42 e.Å <sup>-3</sup>                                                       |

**Table S9.** Potassium  $\alpha$ -D-glucose 1-hydrogenphosphate [18]

| Identification code  | Glc-1PHK (JUGTAG)                                 |
|----------------------|---------------------------------------------------|
| Formula              | C <sub>6</sub> H <sub>12</sub> O <sub>9</sub> P K |
| Formula weight       | 298.23                                            |
| Crystal system       | Orthorhombic                                      |
| Space group          | $P 2_1 2_1 2_1$                                   |
| Unit cell dimensions | $a = 7.35(4) \text{ \AA}$                         |
|                      | $b = 9.666(6) \text{ \AA}$                        |
|                      | $c = 15.230(7) \text{ \AA}$                       |
| Volume               | $1082.16(9) \text{ \AA}^3$                        |
| Density              | 1.83                                              |
| R1                   | R1=0.0316                                         |

Potassium coordination polyhedron for JUGTAG – Glc-1PHK

LK = 6 TRIGONAL PRISM

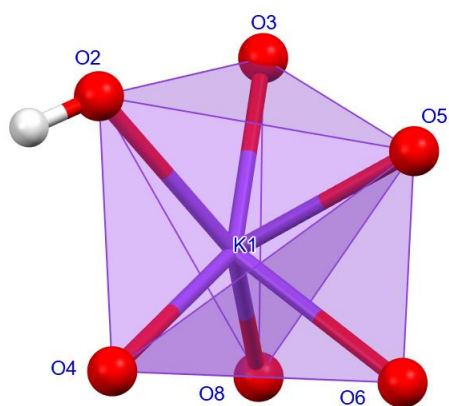

## CATION COORDINATION

**CSD search** for complexes of chemical composition C+H+O+cation (Na/K); R1 < 10%

| Cation coordination number   | Na CN = 5   | Na CN = 6   | K CN = 6    | K CN = 8    |
|------------------------------|-------------|-------------|-------------|-------------|
| Ionic radii (Å) [Shannon]    | 1.14        | 1.16        | 1.52        | 1.65        |
| Na/K....O distance range (Å) | 2.13 – 2.62 | 2.15 – 2.74 | 2.51 – 3.27 | 2.59 – 3.17 |
| <i>No of spheres</i>         | 18          | 48          | 7           | 35          |
| <i>No of bonds</i>           | 18x5        | 48x6        | 7x6         | 35x8        |

**Table S10.** Cation coordination in the Glc-1P2K 2H<sub>2</sub>O crystal

|                                                                                                                                                                                                                                                                                                                            |                                                                                                                 |
|----------------------------------------------------------------------------------------------------------------------------------------------------------------------------------------------------------------------------------------------------------------------------------------------------------------------------|-----------------------------------------------------------------------------------------------------------------|
| <p><b>LK = 6</b></p> <p>K(1)-O(6) 2.716(3)</p> <p>K(1)-O(11) 2.712(3)</p> <p>K(1)-O(4)#1 2.717(3)</p> <p>K(1)-O(5)#2 2.736(2)</p> <p>K(1)-O(3)#3 2.760(3)</p> <p>K(1)-O(1W) 2.881(3)</p> <p>#1 x-1,y,z</p> <p>#2 -x,y-1/2,-z+1</p> <p>#3 -x+1,y-1/2,-z+1</p>                                                               | 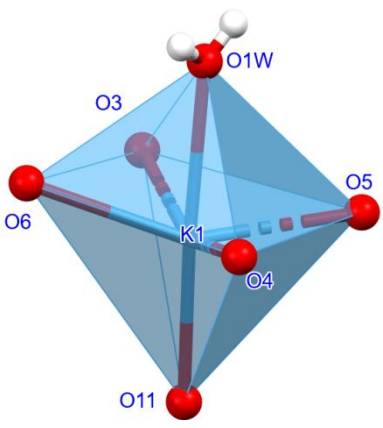 <p>OCTAHEDRON (OC-6)</p>    |
| <p><b>LK = 8</b></p> <p>K(2)-O(2) 2.831(3)</p> <p>K(2)-O(2)#8 3.085(3)</p> <p>K(2)-O(3)#8 3.072(3)</p> <p>K(2)-O(6)#5 2.962(3)</p> <p>K(2)-O(12)#7 3.013(3)</p> <p>K(2)-O(1W)#5 2.939(3)</p> <p>K(2)-O(2W) 2.797(4)</p> <p>K(2)-O(2W)#6 2.943(4)</p> <p>#5 x,y,z-1 #6 -x+1,y+1/2,-z</p> <p>#7 x+1,y,z #8 -x+1,y-1/2,-z</p> |  <p>DODECAHEDRON (DD-8)</p> |

**Table S11.** Cation coordination in the Glc-1P2Na 3.5 H<sub>2</sub>O crystal

|                                                                                                                                                                                                                   |                                                                                                                       |
|-------------------------------------------------------------------------------------------------------------------------------------------------------------------------------------------------------------------|-----------------------------------------------------------------------------------------------------------------------|
| <p><b>LK = 5</b></p> <p>Na(1)-O(13) 2.314 (2)</p> <p>Na(1)-O(2)#1 2.424(2)</p> <p>Na(1)-O(1W) 2.360(2)</p> <p>Na(1)-O(2W) 2.347(2)</p> <p>Na(1)-O(3W) 2.431(2)</p>                                                | 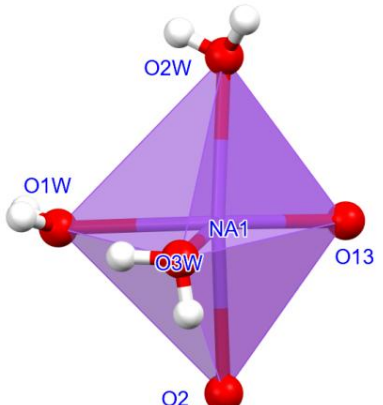 <p>TRIGONAL BIPYRAMID (TBPY-5)</p> |
| <p><b>LK =6 (2-fold axis)</b></p> <p>Na(2)-O(5) 2.440(2)</p> <p>Na(2)-O(6) 2.394(2)</p> <p>Na(2)-O(5)#2 2.440(2)</p> <p>Na(2)-O(6)#2 2.394(2)</p> <p>Na(2)-O(4)#3 2.405(2)</p> <p>Na(2)-O(4)#4 2.405(2)</p>       |  <p>TRIGONAL PRISM (TPR-6)</p>     |
| <p><b>LK =6 (2-fold axis)</b></p> <p>Na(3)-O(13) 2.526(2)</p> <p>Na(3)-O(13)#5 2.526(2)</p> <p>Na(3)-O(2W) 2.397(2)</p> <p>Na(3)-O(2W)#5 2.397(2)</p> <p>Na(3)-O(3W)#6 2.417(2)</p> <p>Na(3)-O(3W)#7 2.417(2)</p> |  <p>OCTAHEDRON (OC-6)</p>         |

Symmetry transformations used to generate equivalent atoms:

#1  $x-1/2, y-1/2, z$  #2  $-x+1, y, -z$  #3  $-x+1/2, y-1/2, -z$

#4  $x+1/2, y-1/2, z$  #5  $-x+1, y, -z+1$  #6  $-x+1/2, y+1/2, -z+1$

#7  $x+1/2, y+1/2, z$  #8  $x-1/2, y+1/2, z$

**Table S12.** Cation coordination in the Glc-1P2Na 5 H<sub>2</sub>O crystal

|                                                                                                                                                                                                    |                                                                                                                      |
|----------------------------------------------------------------------------------------------------------------------------------------------------------------------------------------------------|----------------------------------------------------------------------------------------------------------------------|
| <p><b>LK = 5</b></p> <p>Na(1)-O(5) 2.471(3)</p> <p>Na(1)-O(6) 2.317(3)</p> <p>Na(1)-O(1W) 2.405(4)</p> <p>Na(1)-O(2W) 2.356(4)</p> <p>Na(1)-O(3W) 2.331(4)</p>                                     | 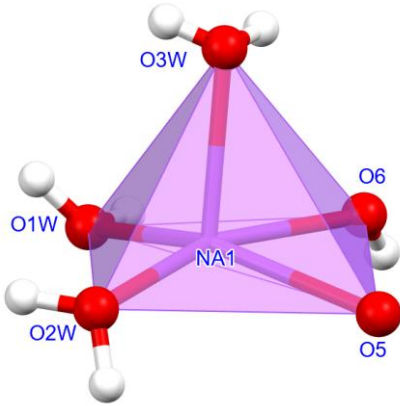 <p>TETRAGONAL PYRAMID (SPY-5)</p> |
| <p><b>LK = 6</b></p> <p>Na(2)-O(1)#2 2.525(3)</p> <p>Na(2)-O(2)#2 2.492(3)</p> <p>Na(2)-O(13) 2.344(3)</p> <p>Na(2)-O(13)#2 2.610(3)</p> <p>Na(2)-O(4W) 2.416(3)</p> <p>Na(2)-O(4W)#1 2.397(4)</p> |  <p>TRIGONAL PRISM (TPR-6)</p>    |

#1  $x+1/2, -y+3/2, -z$ #2  $x-1/2, -y+3/2, -z$



**Table S13.** Cation coordination in the Glc-1PKNa crystal

|                                                                                                                                                                                                                         |                                                                                                                      |
|-------------------------------------------------------------------------------------------------------------------------------------------------------------------------------------------------------------------------|----------------------------------------------------------------------------------------------------------------------|
| <p><b>LK =6</b> (2-fold axis)</p> <p>K(1)-O(2) 2.980(3)</p> <p>K(1)-O(3) 2.735(3)</p> <p>K(1)-O(2)#1 2.980(3)</p> <p>K(1)-O(3)#1 2.735(3)</p> <p>K(1)-O(4)#2 2.913(3)</p> <p>K(1)-O(4)#3 2.913(3)</p>                   | 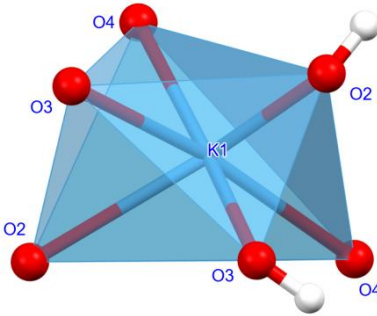 <p>TRIGONAL ANTIPRISM (OC-6)</p>  |
| <p><b>LK = 7</b></p> <p>K(2)-O(1W) 2.709(4)</p> <p>K(2)-O(2W) 2.750(3)</p> <p>K(2)-O(1)#8 2.820(2)</p> <p>K(2)-O(2)#8 2.944(3)</p> <p>K(2)-O(13)#8 2.859(3)</p> <p>K(2)-O(3)#9 2.837(3)</p> <p>K(2)-O(4)#9 3.280(3)</p> |  <p>CAPPED OCTAHEDRON (OCF-7)</p> |
| <p>LK = 6 (on 2-fold axis)</p> <p>Na(1)-O(5) 2.578(2)</p> <p>Na(1)-O(6) 2.344(3)</p> <p>Na(1)-O(4W) 2.273(4)</p> <p>Na(1)-O(5)#10 2.578(2)</p> <p>Na(1)-O(6)#10 2.344(3)</p> <p>Na(1)-O(4W)#10 2.273(4)</p>             |  <p>OCTAHEDRON (OC-6)</p>        |

Symmetry transformations used to generate equivalent atoms:

#1 -x+1,-y+1,z #2 -x+1,-y+1,z+1 #3 x,y,z+1

#4 -x+1/2,y+1/2,-z #5 x+1/2,-y+1/2,-z #6 x+1/2,-y+1/2,-z+1

#7 -x+1/2,y+1/2,-z+1 #8 -x+1/2,y-1/2,-z #9 x-1/2,-y+1/2,-z

#10 -x+1,-y,z #11 -x+1/2,y-1/2,-z+1 #12 x,y,z-1

**Table S14.** Cation coordination and hydrogen bonds in the Glc-1P(NH<sub>4</sub>)Na crystal

|                                                                          |            |                                                                                    |  |
|--------------------------------------------------------------------------|------------|------------------------------------------------------------------------------------|--|
| <b>LK = 6</b>                                                            |            | 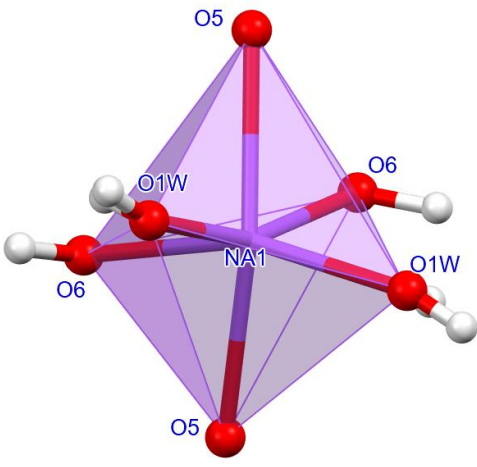 |  |
| Na(1)-O(5)                                                               | 2.535(3) Å |                                                                                    |  |
| Na(1)-O(6)                                                               | 2.365(6)   |                                                                                    |  |
| Na(1)-O(1W)                                                              | 2.317(8)   |                                                                                    |  |
| Na(1)-O(5)#1                                                             | 2.535(3)   |                                                                                    |  |
| Na(1)-O(6)#1                                                             | 2.365(6)   |                                                                                    |  |
| Na(1)-O(1W)#1                                                            | 2.317(8)   |                                                                                    |  |
| Symmetry transformations used to generate equivalent atoms: #1 -x+1,-y,z |            | OCTAHEDRON                                                                         |  |

| D-H...A                | d(D-H) (Å) | d(H...A) (Å) | d(D...A) (Å) | <(DHA) (°) |
|------------------------|------------|--------------|--------------|------------|
| N(1)-H(1N1)...O(12)    | 1.02       | 1.90         | 2.782(6)     | 143        |
| N(1)-H(2N1)...O(11)#2  | 1.01       | 2.02         | 2.817(6)     | 134        |
| N(1)-H(3N1)...O(3)#3   | 1.01       | 2.10         | 2.782(6)     | 123        |
| N(2)-H(1N2)...O(2)     | 1.00       | 2.18         | 3.091(5)     | 151        |
| N(2)-H(2N2)...O(4)#4   | 1.02       | 1.90         | 2.893(5)     | 166        |
| O(2)-H(2O)...O(11)#2   | 0.99       | 1.82         | 2.780(6)     | 161        |
| O(3)-H(3O)...O(4W)     | 0.98       | 2.13         | 3.007(8)     | 148        |
| O(4)-H(4O)...O(12)#5   | 0.99       | 1.63         | 2.611(5)     | 169        |
| O(6)-H(6O)...O(13)#5   | 0.99       | 1.77         | 2.675(5)     | 151        |
| O(1W)-H(2W1)...O(2W)#2 | 0.81       | 1.91         | 2.434(16)    | 122        |
| O(1W)-H(1W1)...O(3W)#6 | 0.77       | 2.48         | 3.069(15)    | 135        |
| O(2W)-H(1W2)...O(6)#1  | 0.99       | 1.80         | 2.753(12)    | 161        |
| O(2W)-H(2W2)...O(5)    | 0.99       | 2.65         | 3.205(12)    | 116        |
| O(2W)-H(2W2)...O(11)   | 0.99       | 1.79         | 2.473(13)    | 123        |
| O(3W)-H(1W3)...O(13)   | 0.95       | 1.76         | 2.690(7)     | 167        |
| O(3W)-H(2W3)...O(12)#7 | 1.01       | 1.82         | 2.761(7)     | 154        |
| O(4W)-H(1W4)...O(3W)#4 | 1.04       | 1.86         | 2.823(9)     | 152        |
| O(4W)-H(2W4)...O(13)#8 | 0.86       | 2.06         | 2.883(7)     | 160        |

Symmetry transformations used to generate equivalent atoms:

#1 -x+1,-y,z #2 x,y,z+1 #3 x-1/2,-y+1/2,-z+2

#4 -x+1,-y+1,z+1 #5 x+1/2,-y+1/2,-z+1 #6 -x+1/2,y-1/2,-z+1

#7 -x+1/2,y+1/2,-z+1 #8 -x+1,-y+1,z

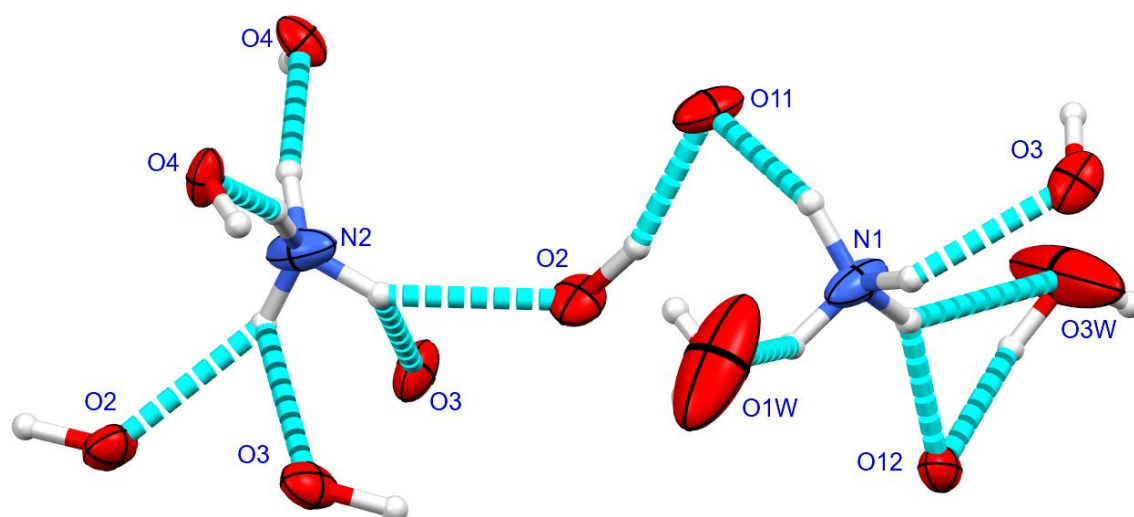

Ammonium cation..... water/hydroxyl interactions

**Table S15.** Cation coordination in the Glc-1PH(NH<sub>4</sub>)K crystal. The K cation occupancy is 31%

|               |           |                                                                                    |
|---------------|-----------|------------------------------------------------------------------------------------|
| <b>LK = 8</b> |           | 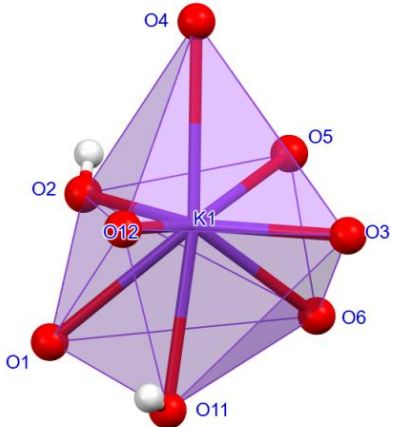 |
| K(1)-O(3)#1   | 2.725(10) |                                                                                    |
| K(1)-O(2)     | 2.725(10) |                                                                                    |
| K(1)-O(6)#2   | 2.857(9)  |                                                                                    |
| K(1)-O(5)#2   | 2.908(9)  |                                                                                    |
| K(1)-O(12)#3  | 3.017(9)  |                                                                                    |
| K(1)-O(11)    | 3.026(10) |                                                                                    |
| K(1)-O(1)     | 3.125(10) |                                                                                    |
| K(1)-O(4)#4   | 3.274(10) | BICAPPED TETRAGONAL PRISM                                                          |

Symmetry transformations used to generate equivalent atoms:

#1  $-x+1, y+1/2, -z+1/2$  #2  $-x+3/2, -y+1, z-1/2$

#3  $x-1/2, -y+3/2, -z+1$  #4  $-x+1/2, -y+1, z-1/2$

Hydrogen bonds O-H...O

| D-H...A               | d(D-H) | d(H...A) | d(D...A) | <(DHA) |
|-----------------------|--------|----------|----------|--------|
| O(2)-H(2O)...O(12)#2  | 0.82   | 1.90     | 2.698(3) | 166    |
| O(3)-H(3O)...O(6)#9   | 0.82   | 2.42     | 2.927(3) | 121    |
| O(4)-H(4O)...O(13)#10 | 0.82   | 1.94     | 2.751(3) | 169    |
| O(6)-H(6O)...O(12)#11 | 0.82   | 1.95     | 2.764(3) | 171    |
| O(11)-H(11)...O(13)#3 | 0.82   | 1.77     | 2.564(3) | 162    |

Symmetry transformations used to generate equivalent atoms:

#2  $-x+3/2, -y+1, z-1/2$  #3  $x-1/2, -y+3/2, -z+1$

#9  $x-1/2, -y+1/2, -z+1$  #10  $x-1, y, z$

#11  $-x+1, y-1/2, -z+3/2$  #12  $x+1, y, z$

**Table S16.** Hydrogen bonds in the Glc-1P2(NH<sub>4</sub>) crystalNH<sub>4</sub><sup>+</sup>.....O distances

|                 |           |                              |           |
|-----------------|-----------|------------------------------|-----------|
| N(1)...O(1)     | 2.973(4)  | <b>N(2) – on 2-fold axis</b> |           |
| N(1)...O(2)     | 3.016(4)  | N(2)...O(2)                  | 3.013(3)  |
| N(1)...O(13)    | 2.906(4)  | N(2)...O(4)#5                | 2.937(4)  |
| N(1)...O(3)#1   | 2.949(4)  | <b>N(3) - disordered</b>     |           |
| N(1)...O(4)#1   | 3.327(4)  | N(3)...O(5)                  | 2.806(12) |
| N(1)...O(2W)#3  | 3.093(6)  | N(3)...O(5)#2                | 3.099(11) |
| N(1)...O(3WA)#4 | 2.850(10) | N(3)...O(6)#2                | 2.759(19) |
| N(1)...O(3WB)#4 | 2.691(10) | N(3)...O(2W)#5               | 2.940(12) |

Geometry of hydrogen bonds

| Donor acceptor         | N-H (Å) | H....O (Å) | N...O (Å) | N-H...O (°) |
|------------------------|---------|------------|-----------|-------------|
| N(1)-H(1N1)...O(2W)#3  | 0.96    | 2.23       | 3.093(6)  | 149         |
| N(1)-H(2N1)...O(1)     | 0.96    | 2.29       | 2.973(4)  | 128         |
| N(1)-H(2N1)...O(13)    | 0.96    | 2.16       | 2.906(4)  | 134         |
| N(1)-H(3N1)...O(3WA)#4 | 0.95    | 2.18       | 2.850(10) | 126         |
| N(1)-H(3N1)...O(3WB)#4 | 0.95    | 1.82       | 2.691(10) | 151         |
| N(1)-H(3N1)...O(2)     | 0.95    | 2.52       | 3.016(4)  | 112         |
| N(1)-H(4N1)...O(3)#1   | 0.94    | 2.40       | 2.949(4)  | 117         |
| N(1)-H(4N1)...O(4)#1   | 0.94    | 2.46       | 3.327(4)  | 152         |
| N(2)-H(1N2)...O(4)#5   | 0.95    | 2.00       | 2.937(4)  | 167         |
| N(2)-H(2N2)...O(2)     | 0.95    | 2.07       | 3.013(3)  | 172         |
| N(3)-H(1N3)...O(5)     | 1.02    | 1.85       | 2.806(12) | 154         |
| N(3)-H(2N3)...O(2W)#5  | 0.98    | 2.09       | 2.940(12) | 144         |
| N(3)-H(4N3)...O(5)#2   | 0.90    | 2.27       | 3.099(11) | 153         |
| N(3)-H(4N3)...O(6)#2   | 0.90    | 2.13       | 2.759(19) | 126         |

Symmetry transformations used to generate equivalent atoms:

#1 -x,-y+1,z #2 -x+1,-y+1,z #3 x-1/2,-y+1/2,-z+1

#4 x-1/2,-y+1/2,-z+2 #5 x,y,z+1 #6 x+1/2,-y+1/2,-z+1

#7 -x+1/2,y+1/2,-z+2 #8 -x+1/2,y+1/2,-z+1
